# Supplementary material for: Extracellular microRNAs in Relation to Weight Loss—A Systematic Review and Meta-Analysis
Source: Noncoding RNA. 2023 Sep 14;9(5):53. doi: 10.3390/ncrna9050053 (PMC10514795; doi:10.3390/ncrna9050053)
Supplement: Supplementary file 1 [file ncrna-09-00053-s001.zip › Veie et al Supplementary file S3 Data extraction sheet.xlsx]

## Sheet: Extraction sheet
Study no.	Citation no.	Author	DOI	Year	Title	Given miR name	Systematic name (hsa-miR-xx-xp)	Length of intervention/observation	Type of intervention	Intervention details	Study design (cohort design i.e. multiple groups, diet or others)	Total n	Intervention group 1 (n)	Intervention group 2 (n)	Intervention group 3 (n)	Intervention group 4 (n)	Control group (n)	Sample material (plasma, serum, whole blood etc.)	Normalization method and details (spike-in, endogenous gene, etc.)	Data represented as (fold change, median, mean, STD, etc.)	Article given largest significant p-value	Baseline measurements (intervention group 1)	After intervention measurement (intervention group 1)	Expression change	SD	CIs /IQR	P-value (intervention 1)	Adjusted P-value	Up/down regulated	Baseline measurements (intervention group 2)	After intervention measurement (intervention group 2)	Expression change2	SD2	Cis/IQR	P-value (intervention 2)	Up/down regulated2	Baseline measurements (intervention group 3)	After intervention measurement (intervention group 3)	Expression change3	P-value (intervention 3)	Up/down regulated3	Baseline measurements (Control if obese, NOT lean)	After intervention measurement (Control)	Expression change4	P-value (Control)	Up/down regulated4	NOS	Sex (M/F/M+F)	Preparation
1	12	Hess et al.	10.1002/oby.22704	2020	Levels of Circulating miR-122 are Associated with Weight Loss and Metabolic Syndrome	miR-21-5p	hsa-miR-21-5p	12 weeks	Energy restricted dietry	Two-armed parallel intervention trial. Patients were randomized to one of two dietary supplements (fiber-containing dietary supplements or matched placebo).	Cohort design with two different diets. One is fiber-containing and one is matched placebo.	85	n = 85 (diet and placebo)					Serum	normalized to the geometric mean of spiked-in ath-miR-159a and U6 small nuclear RNA using the ΔCT method	Log fold change	P ≤ 0.05	1.03+/-4.74	1.24+/-4.03																								90	M+F	not declared
1	12	Hess et al.	10.1002/oby.22704	2020	Levels of Circulating miR-122 are Associated with Weight Loss and Metabolic Syndrome	miR-34a-5p	hsa-miR-34a-5p	12 weeks	Energy restricted dietry	Two-armed parallel intervention trial. Patients were randomized to one of two dietary supplements (fiber-containing dietary supplements or matched placebo).	Cohort design with two different diets. One is fiber-containing and one is matched placebo.	85	n = 85 (diet and placebo)					Serum	normalized to the geometric mean of spiked-in ath-miR-159a and U6 small nuclear RNA using the ΔCT method	Log fold change	P ≤ 0.05	0.71+/-48.98	0.55+/-29.52																								90	M+F	not declared
1	12	Hess et al.	10.1002/oby.22704	2020	Levels of Circulating miR-122 are Associated with Weight Loss and Metabolic Syndrome	miR-122-5p	hsa-miR-122-5p	12 weeks	Energy restricted dietry	Two-armed parallel intervention trial. Patients were randomized to one of two dietary supplements (fiber-containing dietary supplements or matched placebo).	Cohort design with two different diets. One is fiber-containing and one is matched placebo.	85	n = 85 (diet and placebo)					Serum	normalized to the geometric mean of spiked-in ath-miR-159a and U6 small nuclear RNA using the ΔCT method	Log fold change	P ≤ 0.05	0.84+/-1.11	0.73+/-0.7																								90	M+F	not declared
1	12	Hess et al.	10.1002/oby.22704	2020	Levels of Circulating miR-122 are Associated with Weight Loss and Metabolic Syndrome	miR-140-5p	hsa-miR-140-5p	12 weeks	Energy restricted dietry	Two-armed parallel intervention trial. Patients were randomized to one of two dietary supplements (fiber-containing dietary supplements or matched placebo).	Cohort design with two different diets. One is fiber-containing and one is matched placebo.	85	n = 85 (diet and placebo)					Serum	normalized to the geometric mean of spiked-in ath-miR-159a and U6 small nuclear RNA using the ΔCT method	Log fold change	P ≤ 0.05	0.9+/-6.61	1.24+/-3.68																								90	M+F	not declared
1	12	Hess et al.	10.1002/oby.22704	2020	Levels of Circulating miR-122 are Associated with Weight Loss and Metabolic Syndrome	miR-142a-3p	hsa-miR-142-3p	12 weeks	Energy restricted dietry	Two-armed parallel intervention trial. Patients were randomized to one of two dietary supplements (fiber-containing dietary supplements or matched placebo).	Cohort design with two different diets. One is fiber-containing and one is matched placebo.	85	n = 85 (diet and placebo)					Serum	normalized to the geometric mean of spiked-in ath-miR-159a and U6 small nuclear RNA using the ΔCT method	Log fold change	P ≤ 0.05	0.92+/-9.78	0.98+/-8.82																								90	M+F	not declared
1	12	Hess et al.	10.1002/oby.22704	2020	Levels of Circulating miR-122 are Associated with Weight Loss and Metabolic Syndrome	miR-193a-5p	hsa-miR-193a-5p	12 weeks	Energy restricted dietry	Two-armed parallel intervention trial. Patients were randomized to one of two dietary supplements (fiber-containing dietary supplements or matched placebo).	Cohort design with two different diets. One is fiber-containing and one is matched placebo.	85	n = 85 (diet and placebo)					Serum	normalized to the geometric mean of spiked-in ath-miR-159a and U6 small nuclear RNA using the ΔCT method	Log fold change	P ≤ 0.05	0.75+/-1.18	0.62+/-1.02																								90	M+F	not declared
1	12	Hess et al.	10.1002/oby.22704	2020	Levels of Circulating miR-122 are Associated with Weight Loss and Metabolic Syndrome	miR-126a-3p *	hsa-miR-126-3p	12 weeks	Energy restricted dietry	Two-armed parallel intervention trial. Patients were randomized to one of two dietary supplements (fiber-containing dietary supplements or matched placebo).	Cohort design with two different diets. One is fiber-containing and one is matched placebo.	85	n = 85 (diet and placebo)					Serum	normalized to the geometric mean of spiked-in ath-miR-159a and U6 small nuclear RNA using the ΔCT method	Log fold change	P ≤ 0.05	0.8+/-0.82	1.15+/-0.83																								90	M+F	not declared
1	12	Hess et al.	10.1002/oby.22704	2020	Levels of Circulating miR-122 are Associated with Weight Loss and Metabolic Syndrome	miR-16-5p	hsa-miR-16-1-5p	12 weeks	Energy restricted dietry	Two-armed parallel intervention trial. Patients were randomized to one of two dietary supplements (fiber-containing dietary supplements or matched placebo).	Cohort design with two different diets. One is fiber-containing and one is matched placebo.	85	n = 85 (diet and placebo)					Serum	normalized to the geometric mean of spiked-in ath-miR-159a and U6 small nuclear RNA using the ΔCT method	Log fold change	P ≤ 0.05	1.03+/-4.22	1.13+/-4.42																								90	M+F	not declared
1	12	Hess et al.	10.1002/oby.22704	2020	Levels of Circulating miR-122 are Associated with Weight Loss and Metabolic Syndrome	miR-17-5p	hsa-miR-17-5p	12 weeks	Energy restricted dietry	Two-armed parallel intervention trial. Patients were randomized to one of two dietary supplements (fiber-containing dietary supplements or matched placebo).	Cohort design with two different diets. One is fiber-containing and one is matched placebo.	85	n = 85 (diet and placebo)					Serum	normalized to the geometric mean of spiked-in ath-miR-159a and U6 small nuclear RNA using the ΔCT method	Log fold change	P ≤ 0.05	1.05+/-7.08	1.26+/-7.08																								90	M+F	not declared
1	12	Hess et al.	10.1002/oby.22704	2020	Levels of Circulating miR-122 are Associated with Weight Loss and Metabolic Syndrome	miR-221-3p	hsa-miR-221-3p	12 weeks	Energy restricted dietry	Two-armed parallel intervention trial. Patients were randomized to one of two dietary supplements (fiber-containing dietary supplements or matched placebo).	Cohort design with two different diets. One is fiber-containing and one is matched placebo.	85	n = 85 (diet and placebo)					Serum	normalized to the geometric mean of spiked-in ath-miR-159a and U6 small nuclear RNA using the ΔCT method	Log fold change	P ≤ 0.05	0.92+/-7.5	1.1+/-8.82																								90	M+F	not declared
1	12	Hess et al.	10.1002/oby.22704	2020	Levels of Circulating miR-122 are Associated with Weight Loss and Metabolic Syndrome	miR-223-3p	hsa-miR-223-3p	12 weeks	Energy restricted dietry	Two-armed parallel intervention trial. Patients were randomized to one of two dietary supplements (fiber-containing dietary supplements or matched placebo).	Cohort design with two different diets. One is fiber-containing and one is matched placebo.	85	n = 85 (diet and placebo)					Serum	normalized to the geometric mean of spiked-in ath-miR-159a and U6 small nuclear RNA using the ΔCT method	Log fold change	P ≤ 0.05	1.32+/-9.45	0.2																								90	M+F	not declared
2	27	Ravanidis et al.	10.1016/j.fct.2021.112187	2021	Fasting-mediated metabolic and toxicity reprogramming impacts circulating microRNA levels in humans	miR-19b-3p	hsa-miR-19b-3p	10 days	Fasting	Both sexes were included in the group of 32 participants that all followed the dietary.	One group following fasting program with a daily intake of 250 kcal.	32	n = 32 (fasting)					Plasma	Hemolysis control to normalize and also a reference miRNA.	Mean fold expression before and after	P ≤ 0.05	1.741 (+- 0.202)	1.280 (+-0.065)				0.0346																				70	M+F	not declared
2	27	Ravanidis et al.	10.1016/j.fct.2021.112187	2021	Fasting-mediated metabolic and toxicity reprogramming impacts circulating microRNA levels in humans	miR-20a-5p	hsa-miR-20a-5p	10 days	Fasting	Both sexes were included in the group of 32 participants that all followed the dietary.	One group following fasting program with a daily intake of 250 kcal.	32	n = 32 (fasting)					Plasma	Hemolysis control to normalize and also a reference miRNA.	Mean fold expression before and after	P ≤ 0.05	1.421 (+- 0.082)	1.323 (+- 0.085)				0.1748																				70	M+F	not declared
2	27	Ravanidis et al.	10.1016/j.fct.2021.112187	2021	Fasting-mediated metabolic and toxicity reprogramming impacts circulating microRNA levels in humans	miR-27b-3p	hsa-miR-27b-3p	10 days	Fasting	Both sexes were included in the group of 32 participants that all followed the dietary.	One group following fasting program with a daily intake of 250 kcal.	32	n = 32 (fasting)					Plasma	Hemolysis control to normalize and also a reference miRNA.	Mean fold expression before and after	P ≤ 0.05	1.313 (+-0.061)	1.423 (+-0.092)				0.4056																				70	M+F	not declared
2	27	Ravanidis et al.	10.1016/j.fct.2021.112187	2021	Fasting-mediated metabolic and toxicity reprogramming impacts circulating microRNA levels in humans	miR-93-5p	hsa-miR-93-5p	10 days	Fasting	Both sexes were included in the group of 32 participants that all followed the dietary.	One group following fasting program with a daily intake of 250 kcal.	32	n = 32 (fasting)					Plasma	Hemolysis control to normalize and also a reference miRNA.	Mean fold expression before and after	P ≤ 0.05	1.274 (+-0.052)	1.282 (+-0.046)				0.3686																				70	M+F	not declared
2	27	Ravanidis et al.	10.1016/j.fct.2021.112187	2021	Fasting-mediated metabolic and toxicity reprogramming impacts circulating microRNA levels in humans	miR-103a-3p	hsa-miR-103a-3p	10 days	Fasting	Both sexes were included in the group of 32 participants that all followed the dietary.	One group following fasting program with a daily intake of 250 kcal.	32	n = 32 (fasting)					Plasma	Hemolysis control to normalize and also a reference miRNA.	Mean fold expression before and after	P ≤ 0.05	1.543 (+-0.133)	1.428 (+-0.110)				0.8336																				70	M+F	not declared
2	27	Ravanidis et al.	10.1016/j.fct.2021.112187	2021	Fasting-mediated metabolic and toxicity reprogramming impacts circulating microRNA levels in humans	miR-122-5p	hsa-miR-122-5p	10 days	Fasting	Both sexes were included in the group of 32 participants that all followed the dietary.	One group following fasting program with a daily intake of 250 kcal.	32	n = 32 (fasting)					Plasma	Hemolysis control to normalize and also a reference miRNA.	Mean fold expression before and after	P ≤ 0.05	1.634 (+-0.208)	2.788 (+-0.628)				0.0172																				70	M+F	not declared
2	27	Ravanidis et al.	10.1016/j.fct.2021.112187	2021	Fasting-mediated metabolic and toxicity reprogramming impacts circulating microRNA levels in humans	miR-126-3p	hsa-miR-126-3p	10 days	Fasting	Both sexes were included in the group of 32 participants that all followed the dietary.	One group following fasting program with a daily intake of 250 kcal.	32	n = 32 (fasting)					Plasma	Hemolysis control to normalize and also a reference miRNA.	Mean fold expression before and after	P ≤ 0.05	1.151 (+-0.026)	1.328 (+-0.052)				0.0024																				70	M+F	not declared
2	27	Ravanidis et al.	10.1016/j.fct.2021.112187	2021	Fasting-mediated metabolic and toxicity reprogramming impacts circulating microRNA levels in humans	miR-142-3p	hsa-miR-142-3p	10 days	Fasting	Both sexes were included in the group of 32 participants that all followed the dietary.	One group following fasting program with a daily intake of 250 kcal.	32	n = 32 (fasting)					Plasma	Hemolysis control to normalize and also a reference miRNA.	Mean fold expression before and after	P ≤ 0.05	1.609 (+-0.143)	1.181 (+-0.038)				0.0006																				70	M+F	not declared
2	27	Ravanidis et al.	10.1016/j.fct.2021.112187	2021	Fasting-mediated metabolic and toxicity reprogramming impacts circulating microRNA levels in humans	miR-146-5p	hsa-miR-146a-5p	10 days	Fasting	Both sexes were included in the group of 32 participants that all followed the dietary.	One group following fasting program with a daily intake of 250 kcal.	32	n = 32 (fasting)					Plasma	Hemolysis control to normalize and also a reference miRNA.	Mean fold expression before and after	P ≤ 0.05	1.267 (+-0.039)	1.418 (+-0.083)				0.4405																				70	M+F	not declared
2	27	Ravanidis et al.	10.1016/j.fct.2021.112187	2021	Fasting-mediated metabolic and toxicity reprogramming impacts circulating microRNA levels in humans	miR-150-5p	hsa-miR-150-5p	10 days	Fasting	Both sexes were included in the group of 32 participants that all followed the dietary.	One group following fasting program with a daily intake of 250 kcal.	32	n = 32 (fasting)					Plasma	Hemolysis control to normalize and also a reference miRNA.	Mean fold expression before and after	P ≤ 0.05	1.464 (+-0.127)	1.314 (+-0.075)				0.7361																				70	M+F	not declared
2	27	Ravanidis et al.	10.1016/j.fct.2021.112187	2021	Fasting-mediated metabolic and toxicity reprogramming impacts circulating microRNA levels in humans	miR-192-5p	hsa-miR-192-5p	10 days	Fasting	Both sexes were included in the group of 32 participants that all followed the dietary.	One group following fasting program with a daily intake of 250 kcal.	32	n = 32 (fasting)					Plasma	Hemolysis control to normalize and also a reference miRNA.	Mean fold expression before and after	P ≤ 0.05	1.542 (+-0.160)	1.606 (+-0.121)				0.7922																				70	M+F	not declared
2	27	Ravanidis et al.	10.1016/j.fct.2021.112187	2021	Fasting-mediated metabolic and toxicity reprogramming impacts circulating microRNA levels in humans	miR-193a-5p	hsa-miR-193a-5p	10 days	Fasting	Both sexes were included in the group of 32 participants that all followed the dietary.	One group following fasting program with a daily intake of 250 kcal.	32	n = 32 (fasting)					Plasma	Hemolysis control to normalize and also a reference miRNA.	Mean fold expression before and after	P ≤ 0.05	1.519 (+-0.141)	1.533 (+-0.105)				0.6914																				70	M+F	not declared
2	27	Ravanidis et al.	10.1016/j.fct.2021.112187	2021	Fasting-mediated metabolic and toxicity reprogramming impacts circulating microRNA levels in humans	miR-215-5p	hsa-miR-215-5p	10 days	Fasting	Both sexes were included in the group of 32 participants that all followed the dietary.	One group following fasting program with a daily intake of 250 kcal.	32	n = 32 (fasting)					Plasma	Hemolysis control to normalize and also a reference miRNA.	Mean fold expression before and after	P ≤ 0.05	1.496 (+-0.107)	1.578 (+-0.120)				0.6191																				70	M+F	not declared
2	27	Ravanidis et al.	10.1016/j.fct.2021.112187	2021	Fasting-mediated metabolic and toxicity reprogramming impacts circulating microRNA levels in humans	miR-486-5p	hsa-miR-486-5p	10 days	Fasting	Both sexes were included in the group of 32 participants that all followed the dietary.	One group following fasting program with a daily intake of 250 kcal.	32	n = 32 (fasting)					Plasma	Hemolysis control to normalize and also a reference miRNA.	Mean fold expression before and after	P ≤ 0.05	1.538 (+-0.151)	1.468 (+-0.111)				0.4770																				70	M+F	not declared
2	27	Ravanidis et al.	10.1016/j.fct.2021.112187	2021	Fasting-mediated metabolic and toxicity reprogramming impacts circulating microRNA levels in humans	miR-221-3p	hsa-miR-221-3p	10 days	Fasting	Both sexes were included in the group of 32 participants that all followed the dietary.	One group following fasting program with a daily intake of 250 kcal.	32	n = 32 (fasting)					Plasma	Hemolysis control to normalize and also a reference miRNA.	Mean fold expression before and after	P ≤ 0.05	1.385 (+-0.066)	1.202 (+-0.030)				0.1393																				70	M+F	not declared
2	27	Ravanidis et al.	10.1016/j.fct.2021.112187	2021	Fasting-mediated metabolic and toxicity reprogramming impacts circulating microRNA levels in humans	miR-26a-5p	hsa-miR-26a-5p	10 days	Fasting	Both sexes were included in the group of 32 participants that all followed the dietary.	One group following fasting program with a daily intake of 250 kcal.	32	n = 32 (fasting)					Plasma	Hemolysis control to normalize and also a reference miRNA.	Mean fold expression before and after	P ≤ 0.05	1.231 (+-0.036)	1.365 (+- 0.053)				0.0574																				70	M+F	not declared
2	27	Ravanidis et al.	10.1016/j.fct.2021.112187	2021	Fasting-mediated metabolic and toxicity reprogramming impacts circulating microRNA levels in humans	miR-375-3p	hsa-miR-375-3p	10 days	Fasting	Both sexes were included in the group of 32 participants that all followed the dietary.	One group following fasting program with a daily intake of 250 kcal.	32	n = 32 (fasting)					Plasma	Hemolysis control to normalize and also a reference miRNA.	Mean fold expression before and after	P ≤ 0.05	1.775 (+- 0.184)	1.478 (+-0.110)				0.4607																				70	M+F	not declared
3	40	Sangiao-Alvarellos	10.1136/bmjdrc-2020-001441	2020	Metabolic recovery after weight loss surgery is reflected in serum microRNAs	let-7b	hsa-let-7b-5p	12 months	Surgery (Bariatric surgery [RYGB or sleeve])	Group of 155 morbidly obese patients that underwent surgery.	Discovery cohort and a validation cohort that acts like a control with obese persons.	155	3 mdr n = 29	6 mdr n = 27	12 mdr n = 27			Serum	normalizing either to the C. elegans spike-in control (cel-miR-39) or to a global Cq average of the 30 miRNAs that is measured.	Log (2) fold change	p < 0.05			1.48+/-0.39			<0.05					1.61+/-0.61			<0.05				1.24+/-0.33	NS							70	M+F	not declared
3	40	Sangiao-Alvarellos	10.1136/bmjdrc-2020-001441	2020	Metabolic recovery after weight loss surgery is reflected in serum microRNAs	miR-19b	hsa-miR-19b-3p	12 months	Surgery (Bariatric surgery [RYGB or sleeve])	Group of 155 morbidly obese patients that underwent surgery.	Discovery cohort and a validation cohort that acts like a control with obese persons.	155	3 mdr n = 29	6 mdr n = 27	12 mdr n = 27			Serum	normalizing either to the C. elegans spike-in control (cel-miR-39) or to a global Cq average of the 30 miRNAs that is measured.	Log (2) fold change	p < 0.05			1.34+/-0.34			NS					1.45+/-0.44			<0.05				1.37+/-0.41	NS							70	M+F	not declared
3	40	Sangiao-Alvarellos	10.1136/bmjdrc-2020-001441	2020	Metabolic recovery after weight loss surgery is reflected in serum microRNAs	miR-20b	hsa-miR-20b-5p	12 months	Surgery (Bariatric surgery [RYGB or sleeve])	Group of 155 morbidly obese patients that underwent surgery.	Discovery cohort and a validation cohort that acts like a control with obese persons.	155	3 mdr n = 29	6 mdr n = 27	12 mdr n = 27			Serum	normalizing either to the C. elegans spike-in control (cel-miR-39) or to a global Cq average of the 30 miRNAs that is measured.	Log (2) fold change	p < 0.05			1.34+/-0.37			<0.05					2.1+/-0.68			<0.001				1.61+/-0.52	<0.05							70	M+F	not declared
3	40	Sangiao-Alvarellos	10.1136/bmjdrc-2020-001441	2020	Metabolic recovery after weight loss surgery is reflected in serum microRNAs	miR-21	hsa-miR-21-5p	12 months	Surgery (Bariatric surgery [RYGB or sleeve])	Group of 155 morbidly obese patients that underwent surgery.	Discovery cohort and a validation cohort that acts like a control with obese persons.	155	3 mdr n = 29	6 mdr n = 27	12 mdr n = 27			Serum	normalizing either to the C. elegans spike-in control (cel-miR-39) or to a global Cq average of the 30 miRNAs that is measured.	Log (2) fold change	p < 0.05			1.14+/-0.18			NS					1.12+/-0.28			NS				1.06+/-0.24	NS							70	M+F	not declared
3	40	Sangiao-Alvarellos	10.1136/bmjdrc-2020-001441	2020	Metabolic recovery after weight loss surgery is reflected in serum microRNAs	miR-27b	hsa-miR-27b-3p	12 months	Surgery (Bariatric surgery [RYGB or sleeve])	Group of 155 morbidly obese patients that underwent surgery.	Discovery cohort and a validation cohort that acts like a control with obese persons.	155	3 mdr n = 29	6 mdr n = 27	12 mdr n = 27			Serum	normalizing either to the C. elegans spike-in control (cel-miR-39) or to a global Cq average of the 30 miRNAs that is measured.	Log (2) fold change	p < 0.05			0.93+/-0.32			NS					1.06+/-0.72			NS				0.77+/-0.22	NS							70	M+F	not declared
3	40	Sangiao-Alvarellos	10.1136/bmjdrc-2020-001441	2020	Metabolic recovery after weight loss surgery is reflected in serum microRNAs	miR-122	hsa-miR-122-5p	12 months	Surgery (Bariatric surgery [RYGB or sleeve])	Group of 155 morbidly obese patients that underwent surgery.	Discovery cohort and a validation cohort that acts like a control with obese persons.	155	3 mdr n = 29	6 mdr n = 27	12 mdr n = 27			Serum	normalizing either to the C. elegans spike-in control (cel-miR-39) or to a global Cq average of the 30 miRNAs that is measured.	Log (2) fold change	p < 0.05			0.22+/-0.14			<0.001					0.06+/-0.07			<0.001				0.08+/-0.06	<0.001							70	M+F	not declared
3	40	Sangiao-Alvarellos	10.1136/bmjdrc-2020-001441	2020	Metabolic recovery after weight loss surgery is reflected in serum microRNAs	miR-140	hsa-miR-140-3p	12 months	Surgery (Bariatric surgery [RYGB or sleeve])	Group of 155 morbidly obese patients that underwent surgery.	Discovery cohort and a validation cohort that acts like a control with obese persons.	155	3 mdr n = 29	6 mdr n = 27	12 mdr n = 27			Serum	normalizing either to the C. elegans spike-in control (cel-miR-39) or to a global Cq average of the 30 miRNAs that is measured.	Log (2) fold change	p < 0.05			1.14+/-0.97			NS					1.99+/-0.65			<0.001				1.61+/-0.52	<0.05							70	M+F	not declared
3	40	Sangiao-Alvarellos	10.1136/bmjdrc-2020-001441	2020	Metabolic recovery after weight loss surgery is reflected in serum microRNAs	miR-148b	hsa-miR-148b-3p	12 months	Surgery (Bariatric surgery [RYGB or sleeve])	Group of 155 morbidly obese patients that underwent surgery.	Discovery cohort and a validation cohort that acts like a control with obese persons.	155	3 mdr n = 29	6 mdr n = 27	12 mdr n = 27			Serum	normalizing either to the C. elegans spike-in control (cel-miR-39) or to a global Cq average of the 30 miRNAs that is measured.	Log (2) fold change	p < 0.05			0.98+/-0.73			NS					1.79+/-2.58			NS				2.09+/-1.64	<0.05							70	M+F	not declared
3	40	Sangiao-Alvarellos	10.1136/bmjdrc-2020-001441	2020	Metabolic recovery after weight loss surgery is reflected in serum microRNAs	miR-150	hsa-miR-150-5p	12 months	Surgery (Bariatric surgery [RYGB or sleeve])	Group of 155 morbidly obese patients that underwent surgery.	Discovery cohort and a validation cohort that acts like a control with obese persons.	155	3 mdr n = 29	6 mdr n = 27	12 mdr n = 27			Serum	normalizing either to the C. elegans spike-in control (cel-miR-39) or to a global Cq average of the 30 miRNAs that is measured.	Log (2) fold change	p < 0.05			2.37+/-0.93			<0.001					2.21+/-0.97			<0.05				1.37+/-0.57	NS							70	M+F	not declared
3	40	Sangiao-Alvarellos	10.1136/bmjdrc-2020-001441	2020	Metabolic recovery after weight loss surgery is reflected in serum microRNAs	miR-191	hsa-miR-191-5p	12 months	Surgery (Bariatric surgery [RYGB or sleeve])	Group of 155 morbidly obese patients that underwent surgery.	Discovery cohort and a validation cohort that acts like a control with obese persons.	155	3 mdr n = 29	6 mdr n = 27	12 mdr n = 27			Serum	normalizing either to the C. elegans spike-in control (cel-miR-39) or to a global Cq average of the 30 miRNAs that is measured.	Log (2) fold change	p < 0.05			1.56+/-0.47			<0.05					2.33+/-0.8			<0.001				1.61+/-0.38	<0.05							70	M+F	not declared
3	40	Sangiao-Alvarellos	10.1136/bmjdrc-2020-001441	2020	Metabolic recovery after weight loss surgery is reflected in serum microRNAs	miR-192	hsa-miR-192-5p	12 months	Surgery (Bariatric surgery [RYGB or sleeve])	Group of 155 morbidly obese patients that underwent surgery.	Discovery cohort and a validation cohort that acts like a control with obese persons.	155	3 mdr n = 29	6 mdr n = 27	12 mdr n = 27			Serum	normalizing either to the C. elegans spike-in control (cel-miR-39) or to a global Cq average of the 30 miRNAs that is measured.	Log (2) fold change	p < 0.05			0.3+/-0.17			<0.001					0.32+/-0.2			<0.001				0.24+/-0.1	<0.001							70	M+F	not declared
3	40	Sangiao-Alvarellos	10.1136/bmjdrc-2020-001441	2020	Metabolic recovery after weight loss surgery is reflected in serum microRNAs	miR-486	hsa-miR-486-5p	12 months	Surgery (Bariatric surgery [RYGB or sleeve])	Group of 155 morbidly obese patients that underwent surgery.	Discovery cohort and a validation cohort that acts like a control with obese persons.	155	3 mdr n = 29	6 mdr n = 27	12 mdr n = 27			Serum	normalizing either to the C. elegans spike-in control (cel-miR-39) or to a global Cq average of the 30 miRNAs that is measured.	Log (2) fold change	p < 0.05			1.42+/-0.43			<0.05					0.85+/-0.6			NS				0.74+/-0.51	NS							70	M+F	not declared
3	40	Sangiao-Alvarellos	10.1136/bmjdrc-2020-001441	2020	Metabolic recovery after weight loss surgery is reflected in serum microRNAs	miR-221	hsa-miR-221-3p	12 months	Surgery (Bariatric surgery [RYGB or sleeve])	Group of 155 morbidly obese patients that underwent surgery.	Discovery cohort and a validation cohort that acts like a control with obese persons.	155	3 mdr n = 29	6 mdr n = 27	12 mdr n = 27			Serum	normalizing either to the C. elegans spike-in control (cel-miR-39) or to a global Cq average of the 30 miRNAs that is measured.	Log (2) fold change	p < 0.05			1.56+/-0.53			<0.05					3.75+/-1.91			<0.001				2.57+/-1.01	<0.001							70	M+F	not declared
3	40	Sangiao-Alvarellos	10.1136/bmjdrc-2020-001441	2020	Metabolic recovery after weight loss surgery is reflected in serum microRNAs	miR-222	hsa-miR-222-3p	12 months	Surgery (Bariatric surgery [RYGB or sleeve])	Group of 155 morbidly obese patients that underwent surgery.	Discovery cohort and a validation cohort that acts like a control with obese persons.	155	3 mdr n = 29	6 mdr n = 27	12 mdr n = 27			Serum	normalizing either to the C. elegans spike-in control (cel-miR-39) or to a global Cq average of the 30 miRNAs that is measured.	Log (2) fold change	p < 0.05			1.41+/-0.37			<0.05					1.79+/-0.42			<0.001				1.27+/-0.2	<0.05							70	M+F	not declared
3	40	Sangiao-Alvarellos	10.1136/bmjdrc-2020-001441	2020	Metabolic recovery after weight loss surgery is reflected in serum microRNAs	miR-223	hsa-miR-223-3p	12 months	Surgery (Bariatric surgery [RYGB or sleeve])	Group of 155 morbidly obese patients that underwent surgery.	Discovery cohort and a validation cohort that acts like a control with obese persons.	155	3 mdr n = 29	6 mdr n = 27	12 mdr n = 27			Serum	normalizing either to the C. elegans spike-in control (cel-miR-39) or to a global Cq average of the 30 miRNAs that is measured.	Log (2) fold change	p < 0.05			1.5+/-0.46			<0.05					2.21+/-0.68			<0.001				1.35+/-0.52	NS							70	M+F	not declared
3	40	Sangiao-Alvarellos	10.1136/bmjdrc-2020-001441	2020	Metabolic recovery after weight loss surgery is reflected in serum microRNAs	miR-26a	hsa-miR-26a-5p	12 months	Surgery (Bariatric surgery [RYGB or sleeve])	Group of 155 morbidly obese patients that underwent surgery.	Discovery cohort and a validation cohort that acts like a control with obese persons.	155	3 mdr n = 29	6 mdr n = 27	12 mdr n = 27			Serum	normalizing either to the C. elegans spike-in control (cel-miR-39) or to a global Cq average of the 30 miRNAs that is measured.	Log (2) fold change	p < 0.05			1.48+/-0.53			<0.05					2.33+/-0.93			<0.05				1.78+/-0.48	<0.05							70	M+F	not declared
3	40	Sangiao-Alvarellos	10.1136/bmjdrc-2020-001441	2020	Metabolic recovery after weight loss surgery is reflected in serum microRNAs	miR-375	hsa-miR-375-3p	12 months	Surgery (Bariatric surgery [RYGB or sleeve])	Group of 155 morbidly obese patients that underwent surgery.	Discovery cohort and a validation cohort that acts like a control with obese persons.	155	3 mdr n = 29	6 mdr n = 27	12 mdr n = 27			Serum	normalizing either to the C. elegans spike-in control (cel-miR-39) or to a global Cq average of the 30 miRNAs that is measured.	Log (2) fold change	p < 0.05			1.34+/-1.24			NS					0.59+/-0.62			NS				0.7+/-0.56	NS							70	M+F	not declared
4	24	Marsetti et. al	10.1016/j.nut.2020.111085	2020	Changes in miRNA expression with two weight-loss dietary strategies in a population with metabolic syndrome	miR-126	hsa-miR-126-xp	8 weeks	Dietary	Two groups, one are following RESMENA (high meal frequency and high adherence to the Mediterranean diet) and one is a control (based on recommendations from the American Heart Association)	Cohort design with two different diets, one is interventional and one is a control (AHA).	24	RESMENA n=11	Control (AHA) n=13				Whole blood (white blood cells)	No description of normalization method.	Median (Q1, Q3) (Interquartile range)	p < 0.05	5.05 +/- 0.075 (5.02, 5.07)	5.09 +/- 0.075 (5.06, 5.11)	0.05	0.06	(0.03, 0.07)	0.028		Up																		70	M+F	1x centrifugation
4	24	Marsetti et. al	10.1016/j.nut.2020.111085	2020	Changes in miRNA expression with two weight-loss dietary strategies in a population with metabolic syndrome	miR-15a	hsa-miR-15a-5p	8 weeks	Dietary	Two groups, one are following RESMENA (high meal frequency and high adherence to the Mediterranean diet) and one is a control (based on recommendations from the American Heart Association)	Cohort design with two different diets, one is interventional and one is a control (AHA).	24	RESMENA n=11	Control (AHA) n=13				Whole blood (white blood cells)	No description of normalization method.	Median (Q1, Q3) (Interquartile range)	p < 0.05									5.06 (5.04, 5.08)	5.09 (5.07, 5.17)	0.03 (0.00, 0.11)			0.050	Up											70	M+F	1x centrifugation
4	24	Marsetti et. al	10.1016/j.nut.2020.111085	2020	Changes in miRNA expression with two weight-loss dietary strategies in a population with metabolic syndrome	miR-27b	hsa-miR-27b-3p	8 weeks	Dietary	Two groups, one are following RESMENA (high meal frequency and high adherence to the Mediterranean diet) and one is a control (based on recommendations from the American Heart Association)	Cohort design with two different diets, one is interventional and one is a control (AHA).	24	RESMENA n=11	Control (AHA) n=13				Whole blood (white blood cells)	No description of normalization method.	Median (Q1, Q3) (Interquartile range)	p < 0.05									5.05 (5.02, 5.09)	5.08 (5.05, 5.13)	0.03 (_x0001_0.01, 0.07)			0.034	Up											70	M+F	1x centrifugation
4	24	Marsetti et. al	10.1016/j.nut.2020.111085	2020	Changes in miRNA expression with two weight-loss dietary strategies in a population with metabolic syndrome	miR-215	hsa-miR-215-5p	8 weeks	Dietary	Two groups, one are following RESMENA (high meal frequency and high adherence to the Mediterranean diet) and one is a control (based on recommendations from the American Heart Association)	Cohort design with two different diets, one is interventional and one is a control (AHA).	24	RESMENA n=11	Control (AHA) n=13				Whole blood (white blood cells)	No description of normalization method.	Median (Q1, Q3) (Interquartile range)	p < 0.05	5.15 (5.08, 5.17)	5.06 (5.02, 5.12)	_x0001_0.07 (_x0001_0.14, 0.01)			0.041		Down																		70	M+F	1x centrifugation
4	24	Marsetti et. al	10.1016/j.nut.2020.111085	2020	Changes in miRNA expression with two weight-loss dietary strategies in a population with metabolic syndrome	miR-320a	hsa-miR-320a-3p	8 weeks	Dietary	Two groups, one are following RESMENA (high meal frequency and high adherence to the Mediterranean diet) and one is a control (based on recommendations from the American Heart Association)	Cohort design with two different diets, one is interventional and one is a control (AHA).	24	RESMENA n=11	Control (AHA) n=13				Whole blood (white blood cells)	No description of normalization method.	Median (Q1, Q3) (Interquartile range)	p < 0.05									5.06 (5.02, 5.12)	5.13 (5.10, 5.17)	0.05 (0.02, 0.13)			0.010	Up											70	M+F	1x centrifugation
4	24	Marsetti et. al	10.1016/j.nut.2020.111085	2020	Changes in miRNA expression with two weight-loss dietary strategies in a population with metabolic syndrome	miR-320b1	hsa-miR-320b-3p	8 weeks	Dietary	Two groups, one are following RESMENA (high meal frequency and high adherence to the Mediterranean diet) and one is a control (based on recommendations from the American Heart Association)	Cohort design with two different diets, one is interventional and one is a control (AHA).	24	RESMENA n=11	Control (AHA) n=13				Whole blood (white blood cells)	No description of normalization method.	Median (Q1, Q3) (Interquartile range)	p < 0.05									5.08 (5.06, 5.13)	5.05 (5.04, 5.07)	_x0001_0.03 (_x0001_0.06, _x0001_0.02)			0.010	Down											70	M+F	1x centrifugation
5	23	Manning et. al	10.1210/jc.2018-00684	2018	Acute Weight Loss Restores Dysregulated Circulating MicroRNAs in Individuals Who Are Obese	hsa-miR-126-3p	hsa-miR-126-3p	4 weeks	Hypocaloric diet	Two groups, one are following POWER study (prevention of weight regain, very-low-calorie diet <800 kcal/d), and one lean control group.	Cohort design with one group following a diet and one lean control group.	80	POWER n=80				Lean control n=80	Plasma	Normalized to spike-in cel-miR-39-3p	Fold changes +/- SD or Log (2) transformed (geometric means and geometric SDs - marked with bold)	p < 0.05	0.15 +- 2.83	0.84 +- 1.94	5.50 (4.32 to 6.99			P < 0.001		N/A																		60	M+F	1x centrifugation
5	23	Manning et. al	10.1210/jc.2018-00684	2018	Acute Weight Loss Restores Dysregulated Circulating MicroRNAs in Individuals Who Are Obese	hsa-miR-34a	hsa-miR-34a-5p	4 weeks	Hypocaloric diet	Two groups, one are following POWER study (prevention of weight regain, very-low-calorie diet <800 kcal/d), and one lean control group.	Cohort design with one group following a diet and one lean control group.	80	POWER n=80				Lean control n=80	Plasma	Normalized to spike-in cel-miR-39-3p	Fold changes +/- SD or Log (2) transformed (geometric means and geometric SDs - marked with bold)	p < 0.05	3.04 +- 0.58	1.19 +- 0.65	21.85 (-2.02 to 21.68)			P < 0.001		N/A																		60	M+F	1x centrifugation
5	23	Manning et. al	10.1210/jc.2018-00684	2018	Acute Weight Loss Restores Dysregulated Circulating MicroRNAs in Individuals Who Are Obese	hsa-miR-193a	hsa-miR-193a-3p	4 weeks	Hypocaloric diet	Two groups, one are following POWER study (prevention of weight regain, very-low-calorie diet <800 kcal/d), and one lean control group.	Cohort design with one group following a diet and one lean control group.	80	POWER n=80				Lean control n=80	Plasma	Normalized to spike-in cel-miR-39-3p	Fold changes +/- SD or Log (2) transformed (geometric means and geometric SDs - marked with bold)	p < 0.05	23.107 +- 1.91	29.12 +- 2.00	29.12 6 2.00			P < 0.001		N/A																		60	M+F	1x centrifugation
5	23	Manning et. al	10.1210/jc.2018-00684	2018	Acute Weight Loss Restores Dysregulated Circulating MicroRNAs in Individuals Who Are Obese	hsa-miR-320	hsa-miR-320a-3p	4 weeks	Hypocaloric diet	Two groups, one are following POWER study (prevention of weight regain, very-low-calorie diet <800 kcal/d), and one lean control group.	Cohort design with one group following a diet and one lean control group.	80	POWER n=80				Lean control n=80	Plasma	Normalized to spike-in cel-miR-39-3p	Fold changes +/- SD or Log (2) transformed (geometric means and geometric SDs - marked with bold)	p < 0.05	3.15 +/- 1.09	1.91 +- 0.82	21.25 (-1.49 to 21.00)			P < 0.001		N/A																		60	M+F	1x centrifugation
5	23	Manning et. al	10.1210/jc.2018-00684	2018	Acute Weight Loss Restores Dysregulated Circulating MicroRNAs in Individuals Who Are Obese	hsa-miR-375a	hsa-miR-375a-3p	4 weeks	Hypocaloric diet	Two groups, one are following POWER study (prevention of weight regain, very-low-calorie diet <800 kcal/d), and one lean control group.	Cohort design with one group following a diet and one lean control group.	80	POWER n=80				Lean control n=80	Plasma	Normalized to spike-in cel-miR-39-3p	Fold changes +/- SD or Log (2) transformed (geometric means and geometric SDs - marked with bold)	p < 0.05	0.13 +- 2.41	0.96 +- 1.57	7.26 (5.78 to 9.13)			P < 0.001		N/A																		60	M+F	1x centrifugation
6	31	Adams et. al	10.1007/s10549-018-4738-6	2018	Exercise and weight loss interventions and miRNA expression in women with breast cancer	hsa_let_7b_5p	hsa-let-7b-5p	6 months	Weight loss counseling	They have measured miRNA from LEAN study (Lifestyle, Exercise, and Nutrition) which were related to BMI in HOPE trial (Hormones and Physical Exercise)	Cohort design with a diet change which they compare to HOPE study.	85	intervention n=54	UC = 31				Serum	miRNA candidates are used to normalize.	Least square mean with 95% confidence interval	p < 0.1		19.8		47.4627	3.9 to 35.7	P < 0.093		Up (it is assumed that + is up and - i down regulation)		2.5		-7.46269	-9.9 to 14.9	P < 0.093												70	F	not declared
6	31	Adams et. al	10.1007/s10549-018-4738-6	2018	Exercise and weight loss interventions and miRNA expression in women with breast cancer	hsa_miR_24_3p	hsa-miR-24-3p	6 months	Weight loss counseling	They have measured miRNA from LEAN study (Lifestyle, Exercise, and Nutrition) which were related to BMI in HOPE trial (Hormones and Physical Exercise)	Cohort design with a diet change which they compare to HOPE study.	85	intervention n=54	UC = 31				Serum	miRNA candidates are used to normalize.	Least square mean with 95% confidence interval	p < 0.1			6.7		-13 to 26.2	P < 0.099		Up			27.4		12.2 to 42.7	P < 0.099												70	F	not declared
6	31	Adams et. al	10.1007/s10549-018-4738-6	2018	Exercise and weight loss interventions and miRNA expression in women with breast cancer	hsa_miR_92a_3p	hsa-miR-92a-3p	6 months	Weight loss counseling	They have measured miRNA from LEAN study (Lifestyle, Exercise, and Nutrition) which were related to BMI in HOPE trial (Hormones and Physical Exercise)	Cohort design with a diet change which they compare to HOPE study.	85	intervention n=54	UC = 31				Serum	miRNA candidates are used to normalize.	Least square mean with 95% confidence interval	p < 0.1			32.3		-23 to 87.3	P < 0.094		Down			-27		-70 to 15.9	P < 0.094												70	F	not declared
6	31	Adams et. al	10.1007/s10549-018-4738-6	2018	Exercise and weight loss interventions and miRNA expression in women with breast cancer	hsa_miR_106b_5p	hsa-miR-106b-5p	6 months	Weight loss counseling	They have measured miRNA from LEAN study (Lifestyle, Exercise, and Nutrition) which were related to BMI in HOPE trial (Hormones and Physical Exercise)	Cohort design with a diet change which they compare to HOPE study.	85	intervention n=54	UC = 31				Serum	miRNA candidates are used to normalize.	Least square mean with 95% confidence interval	p < 0.1			12.5		2.3 to 22.7	P < 0.041		Down			-1		-9.0 to 6.9	P < 0.041												70	F	not declared
6	31	Adams et. al	10.1007/s10549-018-4738-6	2018	Exercise and weight loss interventions and miRNA expression in women with breast cancer	hsa_miR_191_5p	hsa-miR-191-5p	6 months	Weight loss counseling	They have measured miRNA from LEAN study (Lifestyle, Exercise, and Nutrition) which were related to BMI in HOPE trial (Hormones and Physical Exercise)	Cohort design with a diet change which they compare to HOPE study.	85	intervention n=54	UC = 31				Serum	miRNA candidates are used to normalize.	Least square mean with 95% confidence interval	p < 0.1			-4.6		-37 to 28.0	P < 0.082		Up			32.1		6.6 to 57.6	P < 0.082												70	F	not declared
7	33	Bae et al.	10.1002/oby.22379	2019	Bariatric Surgery Alters microRNA Content of Circulating Exosomes in Patients with Obesity	hsa-miR-193a-5p	hsa-miR-193a-5p	6 months	Surgery (Bariatric surgery)	Two groups, one are obese and underwent surgery, and one lean group.	Cohort design with one group with intervention and one lean control group.	34	n = 16				Lean control n=18	Serum	No description of normalization method.	fold change expression	p < 0.05			6.2																							40	M+F	2x centrifugation
7	33	Bae et al.	10.1002/oby.22379	2019	Bariatric Surgery Alters microRNA Content of Circulating Exosomes in Patients with Obesity	hsa-miR-15a-3p	hsa-miR-15a-3p	6 months	Surgery (Bariatric surgery)	Two groups, one are obese and underwent surgery, and one lean group.	Cohort design with one group with intervention and one lean control group.	34	n = 16				Lean control n=18	Serum	No description of normalization method.	fold change expression	p < 0.05			-4.6																							40	M+F	2x centrifugation
7	33	Bae et al.	10.1002/oby.22379	2019	Bariatric Surgery Alters microRNA Content of Circulating Exosomes in Patients with Obesity	hsa-miR-140-5p	hsa-miR-140-5p	6 months	Surgery (Bariatric surgery)	Two groups, one are obese and underwent surgery, and one lean group.	Cohort design with one group with intervention and one lean control group.	34	n = 16				Lean control n=18	Serum	No description of normalization method.	fold change expression	p < 0.05			-4.1																							40	M+F	2x centrifugation
7	33	Bae et al.	10.1002/oby.22379	2019	Bariatric Surgery Alters microRNA Content of Circulating Exosomes in Patients with Obesity	hsa-miR-142-3p	hsa-miR-142-3p	6 months	Surgery (Bariatric surgery)	Two groups, one are obese and underwent surgery, and one lean group.	Cohort design with one group with intervention and one lean control group.	34	n = 16				Lean control n=18	Serum	No description of normalization method.	fold change expression	p < 0.05			-3.7																							40	M+F	2x centrifugation
7	33	Bae et al.	10.1002/oby.22379	2019	Bariatric Surgery Alters microRNA Content of Circulating Exosomes in Patients with Obesity	hsa-miR-191-5p	hsa-miR-191-5p	6 months	Surgery (Bariatric surgery)	Two groups, one are obese and underwent surgery, and one lean group.	Cohort design with one group with intervention and one lean control group.	34	n = 16				Lean control n=18	Serum	No description of normalization method.	fold change expression	p < 0.05			2.1																							40	M+F	2x centrifugation
8	30	Wen et al.	10.1016/j.orcp.2015.01.006	2015	Circulating microRNA-223 as a potential biomarker for obesity	miR-223	hsa-miR-223-3p	3 months	Dietary and excercise intervention	Three groups, two overweight groups and one lean control.	Cohort design with two groups with intervention and one lean control.	121	n = 40 (obese)	n = 40 (overweight)			n = 41 (normal weight)	Plasma	Normalized to spike-in cel-miR-39	Median (Interquartile range)	p < 0.05	6.17+/-0.31	7.63+/-0.27				<0.05			4.33+/-0.1	5.06+/-0.1				<0.05												70	M+F	1x centrifugation
9	38	Müller et al.	10.1016/j.gene.2020.144787	2020	SNP dependent modulation of circulating miRNAs from the miR25/93/106 T cluster in patients undergoing weight loss	hsa-let-7b-5p	hsa-let-7b-5p	12 weeks	Hypocaloric diet	Weight loss program where participants were allowed to consume a low-calorie formula diet shake (800 kcal/day)	Cohort design with diet induced weight loss due to diet.	12	n = 12					Plasma	Normalized to spike-in cel-miR-39	Log(2) fold change	Not defined for the specific results			-0.54			P < 0.039	P < 0.036	Down																		70	M+F	not declared
9	38	Müller et al.	10.1016/j.gene.2020.144787	2020	SNP dependent modulation of circulating miRNAs from the miR25/93/106 T cluster in patients undergoing weight loss	hsa-miR-25-3p	hsa-miR-25-3p	12 weeks	Hypocaloric diet	Weight loss program where participants were allowed to consume a low-calorie formula diet shake (800 kcal/day)	Cohort design with diet induced weight loss due to diet.	12	n = 12					Plasma	Normalized to spike-in cel-miR-39	Log(2) fold change	Not defined for the specific results			-0.67			P < 0.027	P < 0.027	Down																		70	M+F	not declared
9	38	Müller et al.	10.1016/j.gene.2020.144787	2020	SNP dependent modulation of circulating miRNAs from the miR25/93/106 T cluster in patients undergoing weight loss	hsa-miR-93-5p	hsa-miR-93-5p	12 weeks	Hypocaloric diet	Weight loss program where participants were allowed to consume a low-calorie formula diet shake (800 kcal/day)	Cohort design with diet induced weight loss due to diet.	12	n = 12					Plasma	Normalized to spike-in cel-miR-39	Log(2) fold change	Not defined for the specific results			-0.86			P < 0.061	P < 0.058	Down																		70	M+F	not declared
9	38	Müller et al.	10.1016/j.gene.2020.144787	2020	SNP dependent modulation of circulating miRNAs from the miR25/93/106 T cluster in patients undergoing weight loss	hsa-miR-140-3p	hsa-miR-140-3p	12 weeks	Hypocaloric diet	Weight loss program where participants were allowed to consume a low-calorie formula diet shake (800 kcal/day)	Cohort design with diet induced weight loss due to diet.	12	n = 12					Plasma	Normalized to spike-in cel-miR-39	Log(2) fold change	Not defined for the specific results			-0.20			P < 0.062	P < 0.059	Down																		70	M+F	not declared
9	38	Müller et al.	10.1016/j.gene.2020.144787	2020	SNP dependent modulation of circulating miRNAs from the miR25/93/106 T cluster in patients undergoing weight loss	hsa-miR-148b-3p	hsa-miR-148b-3p	12 weeks	Hypocaloric diet	Weight loss program where participants were allowed to consume a low-calorie formula diet shake (800 kcal/day)	Cohort design with diet induced weight loss due to diet.	12	n = 12					Plasma	Normalized to spike-in cel-miR-39	Log(2) fold change	Not defined for the specific results			0.49			P < 0.068	P < 0.064	Up																		70	M+F	not declared
9	38	Müller et al.	10.1016/j.gene.2020.144787	2020	SNP dependent modulation of circulating miRNAs from the miR25/93/106 T cluster in patients undergoing weight loss	hsa-miR-215-5p	hsa-miR-215-5p	12 weeks	Hypocaloric diet	Weight loss program where participants were allowed to consume a low-calorie formula diet shake (800 kcal/day)	Cohort design with diet induced weight loss due to diet.	12	n = 12					Plasma	Normalized to spike-in cel-miR-39	Log(2) fold change	Not defined for the specific results			-1.47			P < 0.090	P < 0.089	Down																		70	M+F	not declared
9	38	Müller et al.	10.1016/j.gene.2020.144787	2020	SNP dependent modulation of circulating miRNAs from the miR25/93/106 T cluster in patients undergoing weight loss	hsa-miR-486-5p	hsa-miR-486-5p	12 weeks	Hypocaloric diet	Weight loss program where participants were allowed to consume a low-calorie formula diet shake (800 kcal/day)	Cohort design with diet induced weight loss due to diet.	12	n = 12					Plasma	Normalized to spike-in cel-miR-39	Log(2) fold change	Not defined for the specific results			-0.58			P < 0.084	P < 0.080	Down																		70	M+F	not declared
9	38	Müller et al.	10.1016/j.gene.2020.144787	2020	SNP dependent modulation of circulating miRNAs from the miR25/93/106 T cluster in patients undergoing weight loss	hsa-miR-26a-5p	hsa-miR-26a-5p	12 weeks	Hypocaloric diet	Weight loss program where participants were allowed to consume a low-calorie formula diet shake (800 kcal/day)	Cohort design with diet induced weight loss due to diet.	12	n = 12					Plasma	Normalized to spike-in cel-miR-39	Log(2) fold change	Not defined for the specific results			0.52			P < 0.037	P < 0.035	Up																		70	M+F	not declared
10	7	Ortega et al.	10.1373/clinchem.2012.195776	2013	Targeting the Circulating MicroRNA Signature of Obesity	miR-16-1	hsa-miR-16-1-5p	1 year	Surgery (Bariatric surgery)	measured miRNA in pre- and post-surgery induced weight loss, to target the signature of obesity.	Cohort design with surgery induced weightloss.	22	n = 22					Plasma	Normalized to four most stable miRs found in study	Given as mean and 95% Cis	p < 0.05	11.84+/-3.8	3.84+/-0.8					P < 0.0001 (AB)		3.02+/-1.39	3.64+/-3.87																90	F	2x centrifugation
10	7	Ortega et al.	10.1373/clinchem.2012.195776	2013	Targeting the Circulating MicroRNA Signature of Obesity	miR-122	hsa-miR-122-5p	1 year	Surgery (Bariatric surgery) and dieting	measured miRNA in pre- and post-surgery induced weight loss, to target the signature of obesity. As well as the effect of dieting on miRNA profile in a weight loss.	Cohort design with surgery induced weightloss as well as diet induced weight loss.	22	n = 22 (surgery induced)	n = 9 (diet induced)				Plasma	Normalized to four most stable miRs found in study	Given as mean and 95% Cis	p < 0.05	9.24+/-5.11	0.38+/-0.2					P < 0.05 (AB)		0.53+/-0.51	0.53+/-0.63																90	F	2x centrifugation
10	7	Ortega et al.	10.1373/clinchem.2012.195776	2013	Targeting the Circulating MicroRNA Signature of Obesity	miR-140-5p	hsa-miR-140-5p	1 year	Surgery (Bariatric surgery)	measured miRNA in pre- and post-surgery induced weight loss, to target the signature of obesity.	Cohort design with surgery induced weightloss.	22	n = 22					Plasma	Normalized to four most stable miRs found in study	Given as mean and 95% Cis	p < 0.05	2.02+/-0.56	0.71+/-0.16					P < 0.0001 (AB)		0.78+/-0.38	1.08+/-0.49																90	F	2x centrifugation
10	7	Ortega et al.	10.1373/clinchem.2012.195776	2013	Targeting the Circulating MicroRNA Signature of Obesity	miR-142-3p	hsa-miR-142-3p	1 year	Surgery (Bariatric surgery)	measured miRNA in pre- and post-surgery induced weight loss, to target the signature of obesity.	Cohort design with surgery induced weightloss.	22	n = 22					Plasma	Normalized to four most stable miRs found in study	Given as mean and 95% Cis	p < 0.05	1.88+/-0.8	0.92+/-0.31					P < 0.05 (AB)		0.93+/-0.49	0.83+/-0.76																90	F	2x centrifugation
10	7	Ortega et al.	10.1373/clinchem.2012.195776	2013	Targeting the Circulating MicroRNA Signature of Obesity	miR-221	hsa-miR-221-3p	1 year	Surgery (Bariatric surgery)	measured miRNA in pre- and post-surgery induced weight loss, to target the signature of obesity.	Cohort design with surgery induced weightloss.	22	n = 22 surgery induced	n = 9 diet induced				Plasma	Normalized to four most stable miRs found in study	Given as mean and 95% Cis	p < 0.05	0.45+/-0.16	0.8+/-0.2					P < 0.05 (AB)		0.87+/-0.14	1.11+/-0.42																90	F	2x centrifugation
11	34	Cereijo et al.	10.1007/s11695-019-04104-y	2019	Elevated Levels of Circulating miR-92a Are Associated with Impaired Glucose Homeostasis in Patients with Obesity and Correlate with Metabolic Status After Bariatric Surgery	miR-92a	hsa-miR-92a-3p	6 months	Surgery (Bariatric surgery)	Group of 26 obese people underwent surgery and were then compared with a lean group.	Cohort design with one group with intervention and one lean control group.	33	n = 26				Lean n = 7	Serum	Normalized to reference genes	median, interquartile range (IQR)	< 0.05	1.38+/-0.74	0.5+/-0.3																								40	M+F	not declared
12	41	Tabet et al.	10.1371/journal.pone.0151061	2016	High-Density Lipoprotein-Associated miR-223 Is Altered after Diet-Induced Weight Loss in Overweight and Obese Males	miR-126	hsa-miR-126-xp	12 weeks	Dietary	Weight loss program where a high protein diet is compared with normal protein diet. Both groups lost weight.	Cohort design with two groups on two different diets.	47	High protein n = 20	Normal protein n = 27				Serum (They isolated HDL)	Normalized to spike-in cel-miR-39	Mean +/- SD	p < 0.05			0.89+/-0.45								1.27+/-0.73															70	M	immunoprecipitated
12	41	Tabet et al.	10.1371/journal.pone.0151061	2016	High-Density Lipoprotein-Associated miR-223 Is Altered after Diet-Induced Weight Loss in Overweight and Obese Males	miR-16	hsa-miR-16-1-5p	12 weeks	Dietary	Weight loss program where a high protein diet is compared with normal protein diet. Both groups lost weight.	Cohort design with two groups on two different diets.	47	High protein n = 20	Normal protein n = 27				Serum (They isolated HDL)	Normalized to spike-in cel-miR-39	Mean +/- SD	p < 0.05			1.12+/-0.94								1.16+/-0.99															70	M	immunoprecipitated
12	41	Tabet et al.	10.1371/journal.pone.0151061	2016	High-Density Lipoprotein-Associated miR-223 Is Altered after Diet-Induced Weight Loss in Overweight and Obese Males	miR-17	hsa-miR-17-5p	12 weeks	Dietary	Weight loss program where a high protein diet is compared with normal protein diet. Both groups lost weight.	Cohort design with two groups on two different diets.		High protein n = 20	Normal protein n = 27				Serum (They isolated HDL)	Normalized to spike-in cel-miR-39	Mean +/- SD	p < 0.05			0.86+/-0.54								1.44+/-0.99															70	M	immunoprecipitated
12	41	Tabet et al.	10.1371/journal.pone.0151061	2016	High-Density Lipoprotein-Associated miR-223 Is Altered after Diet-Induced Weight Loss in Overweight and Obese Males	miR-222	hsa-miR-222-3p	12 weeks	Dietary	Weight loss program where a high protein diet is compared with normal protein diet. Both groups lost weight.	Cohort design with two groups on two different diets.		High protein n = 20	Normal protein n = 27				Serum (They isolated HDL)	Normalized to spike-in cel-miR-39	Mean +/- SD	p < 0.05			1.18+/-1.12								1.13+/-0.99															70	M	immunoprecipitated
12	41	Tabet et al.	10.1371/journal.pone.0151061	2016	High-Density Lipoprotein-Associated miR-223 Is Altered after Diet-Induced Weight Loss in Overweight and Obese Males	miR-223	hsa-miR-223-3p	12 weeks	Dietary	Weight loss program where a high protein diet is compared with normal protein diet. Both groups lost weight.	Cohort design with two groups on two different diets.		High protein n = 20	Normal protein n = 27				Serum (They isolated HDL)	Normalized to spike-in cel-miR-39	Mean +/- SD	p < 0.05			0.78+/-0.47			<0.05					1.1+/-0.78															70	M	immunoprecipitated
13	21	Ho et al.	10.1194/jlr.RA120000963	2021	High density lipoprotein-associated miRNA is increased following Roux-en-Y gastric bypass surgery for severe obesity	miR-126	hsa-miR-126-xp	12 months	Surgery ( Roux - en-Y gastric bypass)	Each patient was enrolled in standard protocol for gastric bypass surgery.	Cohort design with surgery induced weight loss and a healthy lean group.	71	n = 54 (baseline)	n = 42 (6 months)	n = 53 (12 months)		Lean control n = 18	Serum (They isolated HDL)	Normalized to spike-in cel-miR-39	geometric mean and SD with log scale on the y axis	two-tailed P < 0.05			1.01+/-0.0014								1.01+/-0.0018			P = 0.943				1.01+/-0.0016	P = 0.023							60	M+F	immunoprecipitated
13	21	Ho et al.	10.1194/jlr.RA120000963	2021	High density lipoprotein-associated miRNA is increased following Roux-en-Y gastric bypass surgery for severe obesity	miR-24	hsa-miR-24-3p	12 months	Surgery ( Roux - en-Y gastric bypass)	Each patient was enrolled in standard protocol for gastric bypass surgery.	Cohort design with surgery induced weight loss and a healthy lean group.	71	RYGB n = 53				Lean control n = 18	Serum (They isolated HDL)	Normalized to spike-in cel-miR-39	geometric mean and SD with log scale on the y axis	two-tailed P < 0.05			1.01+/-0.0018			P = 0.006					1.01+/-0.0017			P = 0.033				1.01+/-0.0018	P = 0.004							60	M+F	immunoprecipitated
13	21	Ho et al.	10.1194/jlr.RA120000963	2021	High density lipoprotein-associated miRNA is increased following Roux-en-Y gastric bypass surgery for severe obesity	miR-222	hsa-miR-222-3p	12 months	Surgery ( Roux - en-Y gastric bypass)	Each patient was enrolled in standard protocol for gastric bypass surgery.	Cohort design with surgery induced weight loss and a healthy lean group.	71	RYGB n = 55				Lean control n = 18	Serum (They isolated HDL)	Normalized to spike-in cel-miR-39	geometric mean and SD with log scale on the y axis	two-tailed P < 0.05			1.01+/-0.000009			P = 0.011					1.01+/-0.000011			P = 0.016				1.01+/-0.000008	P = 0.062							60	M+F	immunoprecipitated
13	21	Ho et al.	10.1194/jlr.RA120000963	2021	High density lipoprotein-associated miRNA is increased following Roux-en-Y gastric bypass surgery for severe obesity	miR-223	hsa-miR-223-3p	12 months	Surgery ( Roux - en-Y gastric bypass)	Each patient was enrolled in standard protocol for gastric bypass surgery.	Cohort design with surgery induced weight loss and a healthy lean group.	71	RYGB n = 56				Lean control n = 18	Serum (They isolated HDL)	Normalized to spike-in cel-miR-39	geometric mean and SD with log scale on the y axis	two-tailed P < 0.05			1.04+/-0.013			P = 0.052					1.05+/-0.0147			P = 0.071				1.05+/-0.0139	P = 0.112							60	M+F	immunoprecipitated
14	26	Parr et al.	10.1371/journal.pone.0152545	2016	Circulating MicroRNA Responses between ‘High’ and ‘Low’ Responders to a 16-Wk Diet and Exercise Weight Loss Intervention	miR-221	hsa-miR-221-3p	16 weeks	Hypocaloric diet and exercise	Each patient was following a 16 week diet (250kcal/d) and exercise intervention.	Cohort design investigating the effect of intervention in low responders and high responders.	40	HiRes = 22	LoRes = 18				Resting plasma	Normalized to spike-in Cel-miR-39	Mean +/- SD	p < 0.05	1.07+/-1.03	1.82+/-1.9							1.27+/-1.23	2+/-1.72																50	M+F	2x centrifugation
14	26	Parr et al.	10.1371/journal.pone.0152545	2016	Circulating MicroRNA Responses between ‘High’ and ‘Low’ Responders to a 16-Wk Diet and Exercise Weight Loss Intervention	miR-140	hsa-miR-140-3p	16 weeks	Hypocaloric diet and exercise	Each patient was following a 16 week diet (250kcal/d) and exercise intervention.	Cohort design investigating the effect of intervention in low responders and high responders.	40	HiRes = 22	LoRes = 18				Resting plasma	Normalized to spike-in Cel-miR-39	Mean +/- SD	p < 0.05	0.93+/-0.72	0.99+/-0.64							1.35+/-0.9	1.66+/-0.95																50	M+F	2x centrifugation
14	26	Parr et al.	10.1371/journal.pone.0152545	2016	Circulating MicroRNA Responses between ‘High’ and ‘Low’ Responders to a 16-Wk Diet and Exercise Weight Loss Intervention	miR-223	hsa-miR-223-3p	16 weeks	Hypocaloric diet and exercise	Each patient was following a 16 week diet (250kcal/d) and exercise intervention.	Cohort design investigating the effect of intervention in low responders and high responders.	40	HiRes = 22	LoRes = 18				Resting plasma	Normalized to spike-in Cel-miR-39	Mean +/- SD	p < 0.05	1.37+/-1.38	2.58+/-2.21							1.75+/-1.51	2.2+/-1.81																50	M+F	2x centrifugation
15	28	Russo et al.	10.1002/iub.1926	2018	Physical Activity Modulates the Overexpression of the Inflammatory miR-146a-5p in Obese Patients	miR-126	hsa-miR-126-xp	3 months	Physical activity	Physical activity program from the CURIAMO trial	Cohort of obese patients measuring miRNA before and 3 months after CURIAMO physical intervention	68	n = 31				Lean control n = 37	Plasma	Normalized to spike-in cel-miR-39	Mean +/- SD	considered statistically significant atP≤0.05.	0.3+/--0.05	0.26+/--0.03				NS																				50	M+F	not declared
15	28	Russo et al.	10.1002/iub.1926	2018	Physical Activity Modulates the Overexpression of the Inflammatory miR-146a-5p in Obese Patients	miR-146a	hsa-miR-146a-5p	3 months	Physical activity	Physical activity program from the CURIAMO trial	Cohort of obese patients measuring miRNA before and 3 months after CURIAMO physical intervention	68	n = 31				Lean control n = 37	Plasma	Normalized to spike-in cel-miR-39	Mean +/- SD	considered statistically significant atP≤0.05.	0.593+/-0.17	0.17+/--0.02				P < 0.05																				50	M+F	not declared
16	29	Shin et al.	10.3390/nu12092558	2020	A Traditional Korean Diet Alters the Expression of Circulating MicroRNAs Linked to Diabetes Mellitus in a Pilot Trial	hsa-miR-25-3p	hsa-miR-25-3p	2 weeks	Dietary	Two groups of obese patients divided into K-diet group or control diet group. Same amount of calories.	Cohort design with two groups on two different diets. Both looses weight	10	n = 5 (control diet)					Plasma	Normalized to the Ct values of RNU4	Mean +/- SD	p < 0.05	1.01+/-0.02	2.71+/--0.06				P < 0.05																				60	F	not declared
16	29	Shin et al.	10.3390/nu12092558	2020	A Traditional Korean Diet Alters the Expression of Circulating MicroRNAs Linked to Diabetes Mellitus in a Pilot Trial	hsa-miR-26a-5p	hsa-miR-26a-5p	2 weeks	Dietary	Two groups of obese patients divided into K-diet group or control diet group. Same amount of calories.	Cohort design with two groups on two different diets. Both looses weight	10	n = 5 (K diet)	n = 5 (K diet)				Plasma	Normalized to the Ct values of RNU5	Mean +/- SD	p < 0.05	1.34+/-0.03	0.17+/--0.03				P < 0.05																				60	F	not declared
16	29	Shin et al.	10.3390/nu12092558	2020	A Traditional Korean Diet Alters the Expression of Circulating MicroRNAs Linked to Diabetes Mellitus in a Pilot Trial	hsa-miR-126-3p	hsa-miR-126-3p	2 weeks	Dietary	Two groups of obese patients divided into K-diet group or control diet group. Same amount of calories.	Cohort design with two groups on two different diets. Both looses weight	10	n = 5 (K diet)					Plasma	Normalized to the Ct values of RNU6	Mean +/- SD	p < 0.05	4.88+/--0.05	0.84+/-0.04				P < 0.05																				60	F	not declared
17	20	Donghui et al.	10.1016/j.mvr.2018.10.009	2018	Improvement of microvascular endothelial dysfunction induced by exercise T and diet is associated with microRNA-126 in obese adolescents	miR-126	hsa-miR-126-xp	6 weeks	Exercise and dietary	Dietary and exercise program which were followed by one obese group and one lean group	Cohort design with diet and exercise induced weight loss	67	n = 57 (obese)				Lean control n=10	Serum	Normalized using mir-39 as internal reference	Mean +/- SD	Values of p < 0.05 were considered sta- tistically significant.	0.52+/-0.62	0.67+/-0.75				P < 0.01																				50	F	not declared
18	22	Nunez Lopez et al.	10.1038/ijo.2017.84	2017	Gastric bypass surgery with exercise alters plasma microRNAs that predict improvements in cardiometabolic risk	miR- 221	hsa-miR-221-3p	6 months	Surgery and exercise ( Roux - en-Y gastric bypass)	Patients which underwent surgery where divided into exercise group or no exercise group.	Cohort design with patiens who underwent surgery and after that followed an exercise program or no exercise program.	22	n = 11 (exercise program)	n = 11 (no exercise program)				Plasma	Normalized to spike-in cel-miR-39	Data presented are quantile-normalized log fold changes respective to spiked-in cel-miR-42	p < 0.05	10.66+/--0.09	10.64+/--0.29							10.89+/-0.17	10.39+/--0.13																60	M+F	not declared
18	22	Nunez Lopez et al.	10.1038/ijo.2017.84	2017	Gastric bypass surgery with exercise alters plasma microRNAs that predict improvements in cardiometabolic risk	miR-15a	hsa-miR-15a-5p	6 months	Surgery and exercise ( Roux - en-Y gastric bypass)	Patients which underwent surgery where divided into exercise group or no exercise group.	Cohort design with patiens who underwent surgery and after that followed an exercise program or no exercise program.	22	n = 11 (exercise program)	n = 11 (no exercise program)				Plasma	Normalized to spike-in cel-miR-39	Data presented are quantile-normalized log fold changes respective to spiked-in cel-miR-39	p < 0.05	4.65+/--0.07	5.25+/-0.19							4.77+/-0.09	5.38+/-0.29																60	M+F	not declared
18	22	Nunez Lopez et al.	10.1038/ijo.2017.84	2017	Gastric bypass surgery with exercise alters plasma microRNAs that predict improvements in cardiometabolic risk	miR-34a	hsa-miR-34a-5p	6 months	Surgery and exercise ( Roux - en-Y gastric bypass)	Patients which underwent surgery where divided into exercise group or no exercise group.	Cohort design with patiens who underwent surgery and after that followed an exercise program or no exercise program.	22	n = 11 (exercise program)	n = 11 (no exercise program)				Plasma	Normalized to spike-in cel-miR-39	Data presented are quantile-normalized log fold changes respective to spiked-in cel-miR-40	p < 0.05	3.35+/-0.04	2.83+/--0.51							3.54+/--0.23	2.49+/-0.15																60	M+F	not declared
18	22	Nunez Lopez et al.	10.1038/ijo.2017.84	2017	Gastric bypass surgery with exercise alters plasma microRNAs that predict improvements in cardiometabolic risk	miR-106b	hsa-miR-106b-5p	6 months	Surgery and exercise ( Roux - en-Y gastric bypass)	Patients which underwent surgery where divided into exercise group or no exercise group.	Cohort design with patiens who underwent surgery and after that followed an exercise program or no exercise program.	22	n = 11 (exercise program)	n = 11 (no exercise program)				Plasma	Normalized to spike-in cel-miR-39	Data presented are quantile-normalized log fold changes respective to spiked-in cel-miR-41	p < 0.05	8.6+/-0.23	8.78+/--0.05							8.6+/--0.09	8.9+/--0.02																60	M+F	not declared
18	22	Nunez Lopez et al.	10.1038/ijo.2017.84	2017	Gastric bypass surgery with exercise alters plasma microRNAs that predict improvements in cardiometabolic risk	miR-122	hsa-miR-122-5p	6 months	Surgery and exercise ( Roux - en-Y gastric bypass)	Patients which underwent surgery where divided into exercise group or no exercise group.	Cohort design with patiens who underwent surgery and after that followed an exercise program or no exercise program.	22	n = 11 (exercise program)	n = 11 (no exercise program)				Plasma	Normalized to spike-in cel-miR-39	quantatiles and mean (log scale)	p < 0.05	7.26+/-0.17	5.35+/--0.61							8.52+/--0.52	6.02+/--0.11																60	M+F	not declared
19	36	Hubal et al.	10.1002/oby.21709	2017	Circulating adipocyte-derived exosomal microRNAs associated with decreased insulin resistance after gastric bypass	miR-16-5p	hsa-miR-16-1-5p	12 months	Surgery (Gastric bypass)	Each patient was enrolled in standard protocol for gastric bypass surgery.	Cohort design with surgery induced weightloss including 6 patients.	6	n = 6					Plasma	No description of normalization method.	Fold change +/- SD and P value	p < 0.05			-1.59 +/- 0.11			P < 0.02		Down																		40	F	not declared
19	36	Hubal et al.	10.1002/oby.21709	2017	Circulating adipocyte-derived exosomal microRNAs associated with decreased insulin resistance after gastric bypass	miR-103-3p	hsa-miR-103a-3p	12 months	Surgery (Gastric bypass)	Each patient was enrolled in standard protocol for gastric bypass surgery.	Cohort design with surgery induced weightloss including 6 patients.	6	n = 6					Plasma	No description of normalization method.	Fold change +/- SD and P value	p < 0.05			1.59 +/- 0.25			P < 0.02		Up																		40	F	not declared
20	17	Blum et al.	PMID: 29103239	2017	Elevated Levels of miR-122 in Serum May Contribute to Improved Endothelial Function and Lower Oncologic Risk Following Bariatric Surgery	miR-122	hsa-miR-122-5p	3 months	Surgery (Sleeve)	Each patient was enrolled in standard protocol for sleeve operation.	Cohort design with surgery induced weightloss. The highest increased miRNA served as cDNA for the search of candidate miRNAs.	21	n = 21					Serum	Normalized to miR-451a, which previ- ously showed no significant change following treatment??	Log scale individual entries (calculated to mean and sd)	Not described	88.09+/-205.71	55.54+/-72.86	-0.37+/-0.65			P = 0.025		down																		30	M+F	not declared
21	19	Dimassi et al.	10.1002/oby.22298	2018	Microparticle miRNAs as Biomarkers of Vascular Function and Inflammation Response to Aerobic Exercise in Obesity?	miR-223	hsa-miR-223-3p	8 weeks	Physical activity	Aerobic exercise program in a obese group and a lean control group.	Cohort design with a obese group and lean control.	15	n = 9 (obese)				Lean control n=6	Plasma	Normalized to spike-in cel-miR-39	mean +/- SEM	p < 0.05	116.05+/-45	202.85+/-73.95				P < 0.05																				50	F	2x centrifugation
21	19	Dimassi et al.	10.1002/oby.22298	2018	Microparticle miRNAs as Biomarkers of Vascular Function and Inflammation Response to Aerobic Exercise in Obesity?	miR-21	hsa-miR-21-5p	8 weeks	Physical activity	Aerobic exercise program in a obese group and a lean control group.	Cohort design with a obese group and lean control.	15	n = 9 (obese)				Lean control n=6	Plasma	Normalized to spike-in cel-miR-39	mean +/- SEM	p < 0.05	119.66+/-57.45	220.51+/-76.59				P < 0.05																				50	F	2x centrifugation
21	19	Dimassi et al.	10.1002/oby.22298	2018	Microparticle miRNAs as Biomarkers of Vascular Function and Inflammation Response to Aerobic Exercise in Obesity?	miR-146	hsa-miR-146a-5p	8 weeks	Physical activity	Aerobic exercise program in a obese group and a lean control group.	Cohort design with a obese group and lean control.	15	n = 9 (obese)				Lean control n=6	Plasma	Normalized to spike-in cel-miR-39	mean +/- SEM	p < 0.05	114.53+/-61.29	249+/-81.7				P < 0.05																				50	F	2x centrifugation
21	19	Dimassi et al.	10.1002/oby.22298	2018	Microparticle miRNAs as Biomarkers of Vascular Function and Inflammation Response to Aerobic Exercise in Obesity?	miR-150	hsa-miR-150-5p	8 weeks	Physical activity	Aerobic exercise program in a obese group and a lean control group.	Cohort design with a obese group and lean control.	15	n = 9 (obese)				Lean control n=6	Plasma	Normalized to spike-in cel-miR-39	mean +/- SEM	p < 0.05	138.14+/-30.87	259.88+/-82.32				P < 0.05																				50	F	2x centrifugation
21	19	Dimassi et al.	10.1002/oby.22298	2018	Microparticle miRNAs as Biomarkers of Vascular Function and Inflammation Response to Aerobic Exercise in Obesity?		hsa-miR-126-3p	8 weeks	Physical activity	Aerobic exercise program in a obese group and a lean control group.	Cohort design with a obese group and lean control.	15	n = 9 (obese)				Lean control n=6	Plasma	Normalized to spike-in cel-miR-39	mean +/- SEM	p < 0.05	91.3+/-30.63	137.25+/-61.29
21	19	Dimassi et al.	10.1002/oby.22298	2018	Microparticle miRNAs as Biomarkers of Vascular Function and Inflammation Response to Aerobic Exercise in Obesity?	miR-320a	hsa-miR-320a-3p	8 weeks	Physical activity	Aerobic exercise program in a obese group and a lean control group.	Cohort design with a obese group and lean control.	15	n = 9 (obese)				Lean control n=6	Plasma	Normalized to spike-in cel-miR-39	mean +/- SEM	p < 0.05	163.07+/-68.91	232+/-84.24				p < 0.05																				50	F	2x centrifugation
22	25	Ojeda-Rodríguez	10.1111/ijpo.12910	2022	Circulating miRNAs in girls with abdominal obesity: miR-221-3p as a biomarker of response to weight loss interventions	miR-221-3p	hsa-miR-221-3p	8 weeks and a 22 month follow up	Dietary and excercise intervention	nutritional education based on mediterranean diet style and an increment in physical activity to at least 200 minutes per week	Patients where divided into high or low responders according to the change of BMI	114	n = 26 (low responders)	n = 25 (high responders)				Plasma	Normalized to spike-in cel-miR-42	fig 3? mean +/- SEM	p < 0.05	0.98+/-0.01	0.57+/--0.01				P = 0.014			1.26+/-0	0.51+/-0.01	P = 0.014															60	F	not declared
23	39	Saini et al.	10.3390/nu14091843	2022	Time-Restricted Eating Regimen Differentially Affects Circulatory miRNA Expression in Older Overweight Adults			4 weeks	Fasting																																						40	M+F	1x centrifugation
24	32	Alkandri et al.	10.1186/s40608-018-0199-z	2018	Improved physiology and metabolic flux after Roux-en-Y gastric bypass is associated with temporal changes in the circulating microRNaome: a longitudinal study in humans	miR-20b-5p	hsa-miR-20b-5p	12 months	Surgery ( Roux - en-Y gastric bypass)	Each patient was enrolled in standard protocol for gastric bypass surgery.	Cohort design with surgery induced weightloss including 9 patients.	9	n = 9 (3 months)	n = 9 (6 months)	n = 9 (9 months)	n = 9 (12 months)		Plasma	Normalized to 150Amoles of spike-in cel-miR-39	Fold change +/- SD and P value	p < 0.05																		-5.58	P< 0.0847							40	M+F	not declared
24	32	Alkandri et al.	10.1186/s40608-018-0199-z	2018	Improved physiology and metabolic flux after Roux-en-Y gastric bypass is associated with temporal changes in the circulating microRNaome: a longitudinal study in humans	miR-21-5p	hsa-miR-21-5p	12 months	Surgery ( Roux - en-Y gastric bypass)	Each patient was enrolled in standard protocol for gastric bypass surgery.	Cohort design with surgery induced weightloss including 9 patients.	9	n = 9 (3 months)	n = 9 (6 months)	n = 9 (9 months)	n = 9 (12 months)		Plasma	Normalized to 150Amoles of spike-in cel-miR-39	Fold change +/- SD and P value	p < 0.05																		-2.99	P < 0.0262							40	M+F	not declared
24	32	Alkandri et al.	10.1186/s40608-018-0199-z	2018	Improved physiology and metabolic flux after Roux-en-Y gastric bypass is associated with temporal changes in the circulating microRNaome: a longitudinal study in humans	miR-92a-3p	hsa-miR-92a-3p	12 months	Surgery ( Roux - en-Y gastric bypass)	Each patient was enrolled in standard protocol for gastric bypass surgery.	Cohort design with surgery induced weightloss including 9 patients.	9	n = 9 (3 months)	n = 9 (6 months)	n = 9 (9 months)	n = 9 (12 months)		Plasma	Normalized to 150Amoles of spike-in cel-miR-39	Fold change +/- SD and P value	p < 0.05																		-4.51	P < 0.015							40	M+F	not declared
24	32	Alkandri et al.	10.1186/s40608-018-0199-z	2018	Improved physiology and metabolic flux after Roux-en-Y gastric bypass is associated with temporal changes in the circulating microRNaome: a longitudinal study in humans	miR-93-5p	hsa-miR-93-5p	12 months	Surgery ( Roux - en-Y gastric bypass)	Each patient was enrolled in standard protocol for gastric bypass surgery.	Cohort design with surgery induced weightloss including 9 patients.	9	n = 9 (3 months)	n = 9 (6 months)	n = 9 (9 months)	n = 9 (12 months)		Plasma	Normalized to 150Amoles of spike-in cel-miR-39	Fold change +/- SD and P value	p < 0.05			-11.42			P < 0.0481																				40	M+F	not declared
24	32	Alkandri et al.	10.1186/s40608-018-0199-z	2018	Improved physiology and metabolic flux after Roux-en-Y gastric bypass is associated with temporal changes in the circulating microRNaome: a longitudinal study in humans	miR-106b-5p	hsa-miR-106b-5p	12 months	Surgery ( Roux - en-Y gastric bypass)	Each patient was enrolled in standard protocol for gastric bypass surgery.	Cohort design with surgery induced weightloss including 9 patients.	9	n = 9 (3 months)	n = 9 (6 months)	n = 9 (9 months)	n = 9 (12 months)		Plasma	Normalized to 150Amoles of spike-in cel-miR-39	Fold change +/- SD and P value	p < 0.05			-2.25			P < 0.0277																				40	M+F	not declared
24	32	Alkandri et al.	10.1186/s40608-018-0199-z	2018	Improved physiology and metabolic flux after Roux-en-Y gastric bypass is associated with temporal changes in the circulating microRNaome: a longitudinal study in humans	miR-148b-3p	hsa-miR-148b-3p	12 months	Surgery ( Roux - en-Y gastric bypass)	Each patient was enrolled in standard protocol for gastric bypass surgery.	Cohort design with surgery induced weightloss including 9 patients.	9	n = 9 (3 months)	n = 9 (6 months)	n = 9 (9 months)	n = 9 (12 months)		Plasma	Normalized to 150Amoles of spike-in cel-miR-39	Fold change +/- SD and P value	p < 0.05																		-1.862	P < 0.0496							40	M+F	not declared
24	32	Alkandri et al.	10.1186/s40608-018-0199-z	2018	Improved physiology and metabolic flux after Roux-en-Y gastric bypass is associated with temporal changes in the circulating microRNaome: a longitudinal study in humans	miR-192-5p	hsa-miR-192-5p	12 months	Surgery ( Roux - en-Y gastric bypass)	Each patient was enrolled in standard protocol for gastric bypass surgery.	Cohort design with surgery induced weightloss including 9 patients.	9	n = 9 (3 months)	n = 9 (6 months)	n = 9 (9 months)	n = 9 (12 months)		Plasma	Normalized to 150Amoles of spike-in cel-miR-39	Fold change +/- SD and P value	p < 0.05											-39.763			P < 0.0069				-3.68	P < 0.0158							40	M+F	not declared
24	32	Alkandri et al.	10.1186/s40608-018-0199-z	2018	Improved physiology and metabolic flux after Roux-en-Y gastric bypass is associated with temporal changes in the circulating microRNaome: a longitudinal study in humans	miR-320a	hsa-miR-320a-3p	12 months	Surgery ( Roux - en-Y gastric bypass)	Each patient was enrolled in standard protocol for gastric bypass surgery.	Cohort design with surgery induced weightloss including 9 patients.	9	n = 9 (3 months)	n = 9 (6 months)	n = 9 (9 months)	n = 9 (12 months)		Plasma	Normalized to 150Amoles of spike-in cel-miR-39	Fold change +/- SD and P value	p < 0.05											-4.93			P < 0.0367				-5.06	P < 0.0072							40	M+F	not declared
24	32	Alkandri et al.	10.1186/s40608-018-0199-z	2018	Improved physiology and metabolic flux after Roux-en-Y gastric bypass is associated with temporal changes in the circulating microRNaome: a longitudinal study in humans	miR-320b	hsa-miR-320b-3p	12 months	Surgery ( Roux - en-Y gastric bypass)	Each patient was enrolled in standard protocol for gastric bypass surgery.	Cohort design with surgery induced weightloss including 9 patients.	9	n = 9 (3 months)	n = 9 (6 months)	n = 9 (9 months)	n = 9 (12 months)		Plasma	Normalized to 150Amoles of spike-in cel-miR-39	Fold change +/- SD and P value	p < 0.05																		-3.36	P < 0.0397							40	M+F	not declared
24	32	Alkandri et al.	10.1186/s40608-018-0199-z	2018	Improved physiology and metabolic flux after Roux-en-Y gastric bypass is associated with temporal changes in the circulating microRNaome: a longitudinal study in humans	let-7b-5p	hsa-let-7b-5p	12 months	Surgery ( Roux - en-Y gastric bypass)	Each patient was enrolled in standard protocol for gastric bypass surgery.	Cohort design with surgery induced weightloss including 9 patients.	9	n = 8 (3 months)	n = 7 (6 months)	n = 7 (9 months)	n = 4 (12 months)		Plasma	Normalized to 150Amoles of spike-in cel-miR-39	Fold change +/- SD and P value	p < 0.05			-1.82723			P < 0.0436																				40	M+F	not declared
24	32	Alkandri et al.	10.1186/s40608-018-0199-z	2018	Improved physiology and metabolic flux after Roux-en-Y gastric bypass is associated with temporal changes in the circulating microRNaome: a longitudinal study in humans	miR-15a-5p	hsa-miR-15a-5p	12 months	Surgery ( Roux - en-Y gastric bypass)	Each patient was enrolled in standard protocol for gastric bypass surgery.	Cohort design with surgery induced weightloss including 9 patients.	9	n = 9 (3 months)	n = 9 (6 months)	n = 9 (9 months)	n = 9 (12 months)		Plasma	Normalized to 150Amoles of spike-in cel-miR-39	Fold change +/- SD and P value	p < 0.05																		-6.5224	P < 0.0127							40	M+F	not declared
25	37	Lirun et al.	10.1007/s11695-015-1711-x	2015	A Pilot Study: The Effect of Roux-en-Y Gastric Bypass on the Serum MicroRNAs of the Type 2 Diabetes Patient	let-7b	hsa-let-7b-5p	3 months	Surgery ( Roux - en-Y gastric bypass)	Divided into two groups, high BMI and low BMI. 9 out of 11 took dietetic and exercise therapy meanwhile. Each patient was enrolled in standard protocol for gastric bypass surgery.	Cohort design with 11 patient divided into two groups according to BMI.	13	n = 8 (high BMI group)	n = 7 (low BMI group)				Plasma	No description of normalization method.	Fold change	p < 0.05			3.67								2.31															40	M+F	1x centrifugation
25	37	Lirun et al.	10.1007/s11695-015-1711-x	2015	A Pilot Study: The Effect of Roux-en-Y Gastric Bypass on the Serum MicroRNAs of the Type 2 Diabetes Patient	miR-16	hsa-miR-16-1-5p	3 months	Surgery ( Roux - en-Y gastric bypass)	Divided into two groups, high BMI and low BMI. 9 out of 11 took dietetic and exercise therapy meanwhile. Each patient was enrolled in standard protocol for gastric bypass surgery.	Cohort design with 11 patient divided into two groups according to BMI.	13	n = 8 (high BMI group)	n = 7 (low BMI group)				Plasma	No description of normalization method.	Fold change	p < 0.05			6.84								1.52															40	M+F	1x centrifugation
25	37	Lirun et al.	10.1007/s11695-015-1711-x	2015	A Pilot Study: The Effect of Roux-en-Y Gastric Bypass on the Serum MicroRNAs of the Type 2 Diabetes Patient	miR-17	hsa-miR-17-5p	3 months	Surgery ( Roux - en-Y gastric bypass)	Divided into two groups, high BMI and low BMI. 9 out of 11 took dietetic and exercise therapy meanwhile. Each patient was enrolled in standard protocol for gastric bypass surgery.	Cohort design with 11 patient divided into two groups according to BMI.	13	n = 8 (high BMI group)	n = 7 (low BMI group)				Plasma	No description of normalization method.	Fold change	p < 0.05			6.05								2.82															40	M+F	1x centrifugation
25	37	Lirun et al.	10.1007/s11695-015-1711-x	2015	A Pilot Study: The Effect of Roux-en-Y Gastric Bypass on the Serum MicroRNAs of the Type 2 Diabetes Patient	miR-221	hsa-miR-221-3p	3 months	Surgery ( Roux - en-Y gastric bypass)	Divided into two groups, high BMI and low BMI. 9 out of 11 took dietetic and exercise therapy meanwhile. Each patient was enrolled in standard protocol for gastric bypass surgery.	Cohort design with 11 patient divided into two groups according to BMI.	13	n = 8 (high BMI group)	n = 7 (low BMI group)				Plasma	No description of normalization method.	Fold change	p < 0.05			4.41								8.52															40	M+F	1x centrifugation
25	37	Lirun et al.	10.1007/s11695-015-1711-x	2015	A Pilot Study: The Effect of Roux-en-Y Gastric Bypass on the Serum MicroRNAs of the Type 2 Diabetes Patient	miR-26a	hsa-miR-26a-5p	3 months	Surgery ( Roux - en-Y gastric bypass)	Divided into two groups, high BMI and low BMI. 9 out of 11 took dietetic and exercise therapy meanwhile. Each patient was enrolled in standard protocol for gastric bypass surgery.	Cohort design with 11 patient divided into two groups according to BMI.	13	n = 8 (high BMI group)	n = 7 (low BMI group)				Plasma	No description of normalization method.	Fold change	p < 0.05			3.14								3.08															40	M+F	1x centrifugation
25	37	Lirun et al.	10.1007/s11695-015-1711-x	2015	A Pilot Study: The Effect of Roux-en-Y Gastric Bypass on the Serum MicroRNAs of the Type 2 Diabetes Patient	miR-19b	hsa-miR-19b-3p	3 months	Surgery ( Roux - en-Y gastric bypass)	Divided into two groups, high BMI and low BMI. 9 out of 11 took dietetic and exercise therapy meanwhile. Each patient was enrolled in standard protocol for gastric bypass surgery.	Cohort design with 11 patient divided into two groups according to BMI.	13	n = 8 (high BMI group)	n = 7 (low BMI group)				Plasma	No description of normalization method.	Fold change	p < 0.05			11.48								4.49															40	M+F	1x centrifugation
25	37	Lirun et al.	10.1007/s11695-015-1711-x	2015	A Pilot Study: The Effect of Roux-en-Y Gastric Bypass on the Serum MicroRNAs of the Type 2 Diabetes Patient	miR-20a	hsa-miR-20a-5p	3 months	Surgery ( Roux - en-Y gastric bypass)	Divided into two groups, high BMI and low BMI. 9 out of 11 took dietetic and exercise therapy meanwhile. Each patient was enrolled in standard protocol for gastric bypass surgery.	Cohort design with 11 patient divided into two groups according to BMI.	13	n = 8 (high BMI group)	n = 7 (low BMI group)				Plasma	No description of normalization method.	Fold change	p < 0.05			9.14								4.11															40	M+F	1x centrifugation
25	37	Lirun et al.	10.1007/s11695-015-1711-x	2015	A Pilot Study: The Effect of Roux-en-Y Gastric Bypass on the Serum MicroRNAs of the Type 2 Diabetes Patient	miR-24	hsa-miR-24-3p	3 months	Surgery ( Roux - en-Y gastric bypass)	Divided into two groups, high BMI and low BMI. 9 out of 11 took dietetic and exercise therapy meanwhile. Each patient was enrolled in standard protocol for gastric bypass surgery.	Cohort design with 11 patient divided into two groups according to BMI.	13	n = 8 (high BMI group)	n = 7 (low BMI group)				Plasma	No description of normalization method.	Fold change	p < 0.05			2.85								2.39															40	M+F	1x centrifugation
25	37	Lirun et al.	10.1007/s11695-015-1711-x	2015	A Pilot Study: The Effect of Roux-en-Y Gastric Bypass on the Serum MicroRNAs of the Type 2 Diabetes Patient	miR-25	hsa-miR-25-3p	3 months	Surgery ( Roux - en-Y gastric bypass)	Divided into two groups, high BMI and low BMI. 9 out of 11 took dietetic and exercise therapy meanwhile. Each patient was enrolled in standard protocol for gastric bypass surgery.	Cohort design with 11 patient divided into two groups according to BMI.	13	n = 8 (high BMI group)	n = 7 (low BMI group)				Plasma	No description of normalization method.	Fold change	p < 0.05			4.82								3.25															40	M+F	1x centrifugation
25	37	Lirun et al.	10.1007/s11695-015-1711-x	2015	A Pilot Study: The Effect of Roux-en-Y Gastric Bypass on the Serum MicroRNAs of the Type 2 Diabetes Patient	miR-92a	hsa-miR-92a-3p	3 months	Surgery ( Roux - en-Y gastric bypass)	Divided into two groups, high BMI and low BMI. 9 out of 11 took dietetic and exercise therapy meanwhile. Each patient was enrolled in standard protocol for gastric bypass surgery.	Cohort design with 11 patient divided into two groups according to BMI.	13	n = 8 (high BMI group)	n = 7 (low BMI group)				Plasma	No description of normalization method.	Fold change	p < 0.05			9.72								3.61															40	M+F	1x centrifugation
25	37	Lirun et al.	10.1007/s11695-015-1711-x	2015	A Pilot Study: The Effect of Roux-en-Y Gastric Bypass on the Serum MicroRNAs of the Type 2 Diabetes Patient	miR-93	hsa-miR-93-5p	3 months	Surgery ( Roux - en-Y gastric bypass)	Divided into two groups, high BMI and low BMI. 9 out of 11 took dietetic and exercise therapy meanwhile. Each patient was enrolled in standard protocol for gastric bypass surgery.	Cohort design with 11 patient divided into two groups according to BMI.	13	n = 8 (high BMI group)	n = 7 (low BMI group)				Plasma	No description of normalization method.	Fold change	p < 0.05			4.11								2.92															40	M+F	1x centrifugation
25	37	Lirun et al.	10.1007/s11695-015-1711-x	2015	A Pilot Study: The Effect of Roux-en-Y Gastric Bypass on the Serum MicroRNAs of the Type 2 Diabetes Patient	miR-103a	hsa-miR-103a-3p	3 months	Surgery ( Roux - en-Y gastric bypass)	Divided into two groups, high BMI and low BMI. 9 out of 11 took dietetic and exercise therapy meanwhile. Each patient was enrolled in standard protocol for gastric bypass surgery.	Cohort design with 11 patient divided into two groups according to BMI.	13	n = 8 (high BMI group)	n = 7 (low BMI group)				Plasma	No description of normalization method.	Fold change	p < 0.05			3.77								4.08															40	M+F	1x centrifugation
25	37	Lirun et al.	10.1007/s11695-015-1711-x	2015	A Pilot Study: The Effect of Roux-en-Y Gastric Bypass on the Serum MicroRNAs of the Type 2 Diabetes Patient	miR-106b	hsa-miR-106b-5p	3 months	Surgery ( Roux - en-Y gastric bypass)	Divided into two groups, high BMI and low BMI. 9 out of 11 took dietetic and exercise therapy meanwhile. Each patient was enrolled in standard protocol for gastric bypass surgery.	Cohort design with 11 patient divided into two groups according to BMI.	13	n = 8 (high BMI group)	n = 7 (low BMI group)				Plasma	No description of normalization method.	Fold change	p < 0.05			7.87								3.58															40	M+F	1x centrifugation
25	37	Lirun et al.	10.1007/s11695-015-1711-x	2015	A Pilot Study: The Effect of Roux-en-Y Gastric Bypass on the Serum MicroRNAs of the Type 2 Diabetes Patient	miR-146a	hsa-miR-146a-5p	3 months	Surgery ( Roux - en-Y gastric bypass)	Divided into two groups, high BMI and low BMI. 9 out of 11 took dietetic and exercise therapy meanwhile. Each patient was enrolled in standard protocol for gastric bypass surgery.	Cohort design with 11 patient divided into two groups according to BMI.	13	n = 8 (high BMI group)	n = 7 (low BMI group)				Plasma	No description of normalization method.	Fold change	p < 0.05			NA								NA															40	M+F	1x centrifugation
25	37	Lirun et al.	10.1007/s11695-015-1711-x	2015	A Pilot Study: The Effect of Roux-en-Y Gastric Bypass on the Serum MicroRNAs of the Type 2 Diabetes Patient	miR-191	hsa-miR-191-5p	3 months	Surgery ( Roux - en-Y gastric bypass)	Divided into two groups, high BMI and low BMI. 9 out of 11 took dietetic and exercise therapy meanwhile. Each patient was enrolled in standard protocol for gastric bypass surgery.	Cohort design with 11 patient divided into two groups according to BMI.	13	n = 8 (high BMI group)	n = 7 (low BMI group)				Plasma	No description of normalization method.	Fold change	p < 0.05			3.14								5.84															40	M+F	1x centrifugation
25	37	Lirun et al.	10.1007/s11695-015-1711-x	2015	A Pilot Study: The Effect of Roux-en-Y Gastric Bypass on the Serum MicroRNAs of the Type 2 Diabetes Patient	miR-320a	hsa-miR-320a-3p	3 months	Surgery ( Roux - en-Y gastric bypass)	Divided into two groups, high BMI and low BMI. 9 out of 11 took dietetic and exercise therapy meanwhile. Each patient was enrolled in standard protocol for gastric bypass surgery.	Cohort design with 11 patient divided into two groups according to BMI.	13	n = 8 (high BMI group)	n = 7 (low BMI group)				Plasma	No description of normalization method.	Fold change	p < 0.05			23.57								126.01															40	M+F	1x centrifugation
25	37	Lirun et al.	10.1007/s11695-015-1711-x	2015	A Pilot Study: The Effect of Roux-en-Y Gastric Bypass on the Serum MicroRNAs of the Type 2 Diabetes Patient	miR-320b	hsa-miR-320b-3p	3 months	Surgery ( Roux - en-Y gastric bypass)	Divided into two groups, high BMI and low BMI. 9 out of 11 took dietetic and exercise therapy meanwhile. Each patient was enrolled in standard protocol for gastric bypass surgery.	Cohort design with 11 patient divided into two groups according to BMI.	13	n = 8 (high BMI group)	n = 7 (low BMI group)				Plasma	No description of normalization method.	Fold change	p < 0.05			10.99								72.49															40	M+F	1x centrifugation
25	37	Lirun et al.	10.1007/s11695-015-1711-x	2015	A Pilot Study: The Effect of Roux-en-Y Gastric Bypass on the Serum MicroRNAs of the Type 2 Diabetes Patient	miR-486-5p	hsa-miR-486-5p	3 months	Surgery ( Roux - en-Y gastric bypass)	Divided into two groups, high BMI and low BMI. 9 out of 11 took dietetic and exercise therapy meanwhile. Each patient was enrolled in standard protocol for gastric bypass surgery.	Cohort design with 11 patient divided into two groups according to BMI.	13	n = 8 (high BMI group)	n = 7 (low BMI group)				Plasma	No description of normalization method.	Fold change	p < 0.05			119.54								5.35															40	M+F	1x centrifugation
26	18	Cannataro et al.	10.2174/2211536608666181126093903	2018	Ketogenic Diet Acts on Body Remodeling and MicroRNAs Expression Profile	hsa-miR-26a-5p	hsa-miR-26a-5p	6 weeks	Dietary	the patients followed a ketotonic diet (KD)	Cohort design with one group divided into men and women following KD. Measurement at baseline and 6 week post.	36	n = 36 men	n = 36 women				Serum	Normalized to spike-in	box and whiskers, no description of how data is represented	p < 0.05	157.49+/-202.88	454.55+/-966.995				NA			172+/-37.53	478.27+/-1018.675																70	M+F	1x centrifugation
26	18	Cannataro et al.	10.2174/2211536608666181126093903	2018	Ketogenic Diet Acts on Body Remodeling and MicroRNAs Expression Profile	hsa-miR-148b-3p	hsa-miR-148b-3p	6 weeks	Dietary	the patients followed a ketotonic diet (KD)	Cohort design with one group divided into men and women following KD. Measurement at baseline and 6 week post.	36	n = 36					Serum	Normalized to spike-in	box and whiskers, no description of how data is represented	p < 0.05	64.36+/-31.92	65.92+/-373.685				NA																				70	M+F	1x centrifugation
27	35	Heianza et al.	10.2337/dc21-2517	2022	Changes in Circulating miR-375-3p and Improvements in Visceral and Hepatic Fat Contents in Response to Lifestyle Interventions: The CENTRAL Trial	miR-375-3p	hsa-miR-375-3p	18 months	Dietary	The patients were randomly divided into low-fat diet or a Medi- terranean/low-carbohydrate diet. After 6 months they were further divided into physical activity/none groups	Cohort desing with a total of 278 patients in the beginning divided randomly into two groups: low fat diet or Medi- terranean/low-carbohydrate diet. After 6 month they were further random divided into physical activity/no PA groups.	278	n = 139 low fat diet	n = 139 Mediterranean/low-carbohydrate diet	n = 139 Physical activity	n = 139 No physical activity		Not described	No description of normalization method.	Log transformed	p < 0.05			1.95			P<0.001					1.66			P<0.001				2.3	P<0.001				1.42	P = 0.01		60	M+F	not declared
[truncated: 3 more columns]

## Sheet: NOS
	NEWCASTLE-OTTAWA QUALITY ASSESMENT SCALE FOR COHORT STUDIES
	The articles included will always have: Interventions with weight loss, circulating miRNA, obese subjects BMI > 25, before and after intervention measurements, and significant data.
	Selection
	Representativeness of the exposed cohort:
	1a	Truly representative of the average obese person*.
	1a	Somewhat representative of the average obese person (morbidly obese, comorbidities, or other subgroups) *.
	1a	Selected group of people (healthy people).
	1a	No description of the derivation of the cohort.
	Selection of the non-exposed cohort:
	1b	Drawn from the same community as the exposed cohort*.
	1b	Drawn from a different source.
	1b	No description of the derivation of the non-exposed cohort.
	Ascertainment of exposure:
	1c	Secure record (e.g., surgical records, written consents) *.
	1c	Structured interviews *.
	1c	Written self-report.
	1c	No description.
	Description that no weight loss had begun before start of the study:
	1d	Yes *.
	1d	No.
	Comparability
	Comparability of cohorts based on the design or analysis:
	2a	Study adjusts for age and sex *.
	2a	Study adjusts for any additional factors (BMI or other described factors) *.
	2a	No description of adjustment.
	Methods
	Description of statistical analyses and statement of p-value:
	3a	Yes *.
	3a	Not described.
	Hypothesis approach for miRNA selection:
	3b	Hypothesis free *.
	3b	Hypothesis driven.
	Normalization of miRNA expression data:
	3c	Strong normalization (global mean, two factors i.e., spike-in and endogenous RNA, or two within same method) **.
	3c	Normalization using only one spike-in or endogenous RNA *.
	3c	Normalization method not indicated.
	Is there transparency in data presentation and calculations?
	3d	Yes *.
	3d	No.

## Sheet: NOS-points
Study name
Study name	Study number	Selection				Comparability	Method				Total points	Total sum	Point	% points	% no point
Hess et. al., 2020	1	1	1	1	1	1	1	0	2	1	9	10	9	0.9	0.1
Ortega et al., 2022	11	1	1	1	0	1	1	1	2	1	9	10	9	0.9	0.1
Sangiao-Alvarellos et al., 2020	3	1	0	0	0	2	1	1	2	1	8	10	8	0.8	0.2
Ravanidis et al., 2021	2	1	0	1	0	1	1	0	2	1	7	10	7	0.7	0.3
Marsetti et al., 2020	4	1	1	1	1	0	1	1	0	1	7	10	7	0.7	0.3
Adams et al., 2018	7	1	0	1	1	0	1	0	2	1	7	10	7	0.7	0.3
Wen et al., 2015	9	1	0	1	0	2	1	0	1	1	7	10	7	0.7	0.3
Müller et al., 2020	10	1	0	1	1	0	1	0	2	1	7	10	7	0.7	0.3
Tabet et al., 2016	13	1	1	1	0	0	1	0	2	1	7	10	7	0.7	0.3
Cannataro et al., 2019	27	1	0	1	0	0	1	1	2	1	7	10	7	0.7	0.3
Manning et al., 2018	5	1	0	1	0	1	1	1	1	0	6	10	6	0.6	0.4
Ho et al., 2021	14	1	0	1	0	1	1	0	2	0	6	10	6	0.6	0.4
Shin et al., 2020	17	1	1	1	0	0	1	0	1	1	6	10	6	0.6	0.4
Nunez Lopez et al., 2017	19	1	1	1	0	1	1	0	1	0	6	10	6	0.6	0.4
Ojeda-Rodrígez et al., 2022	23	1	0	1	0	1	1	0	1	1	6	10	6	0.6	0.4
Heianza et al., 2022	28	1	1	1	0	1	1	0	0	1	6	10	6	0.6	0.4
Parr et al., 2016	15	1	1	1	0	0	1	0	1	0	5	10	5	0.5	0.5
Russo et al., 2018	16	1	0	1	0	0	1	0	1	1	5	10	5	0.5	0.5
Donghui et al., 2018	18	1	0	1	0	0	1	0	1	1	5	10	5	0.5	0.5
Dimassi et al., 2018	22	1	0	1	0	0	1	0	1	1	5	10	5	0.5	0.5
Bae et al., 2019	8	1	0	1	0	0	1	1	0	0	4	10	4	0.4	0.6
Cereijo et al., 2019	12	1	0	1	0	0	1	0	1	0	4	10	4	0.4	0.6
Hubal et al., 2017	20	1	0	1	0	0	1	0	0	1	4	10	4	0.4	0.6
Saini et al., 2022	24	1	0	0	1	0	1	1	0	0	4	10	4	0.4	0.6
Alkandari et al., 2018	25	1	0	1	0	0	0	1	1	0	4	10	4	0.4	0.6
Lirun et al., 2015	26	1	0	1	0	0	1	1	0	0	4	10	4	0.4	0.6
Blum et al., 2017	21	1	0	0	0	0	0	0	1	0	2	10	2	0.2	0.8
		1A	1B	1C	1D	2A	3A	3B	3C	3D
		26	8	24	5	12	25	9	29	17

## Sheet: Pie chart
miR diversity				miRNA name	Representations
Seperate miRNAs investigated in one article	145			miR-126	10
Seperate miRNAs investigated in two articles	31			miR-221	8
Seperate miRNAs investigated in three articles	15			miR-223	7
Seperate miRNAs investigated in four articles	7			miR-122	6
Seperate miRNAs investigated in five articles	5			miR-16	6
Seperate miRNAs investigated in six articles	5			miR-140	6
Seperate miRNAs investigated in seven articles	1			miR-26a	6
Seperate miRNAs investigated in eight articles	1			miR-320a	6
Seperate miRNAs investigated in nine articles	0			miR-21	5
Seperate miRNAs investigated in 10 articles (miR-126)	1			miR-148b	5
	211			miR-486	5
				let-7b	5
				miR-106b	5
				miR-222	4
				miR-93	4
				miR-146	4
				miR-375	4
				miR-191	4
				miR-15a	4
				miR-92a	4
				miR-193a	3
				miR-34a	3
				miR-143	3
				miR-19b	3
				miR-22	3
				miR-142	3
				miR-27b	3
				miR-29a	3
				miR-150	3
				miR-192	3
				miR-215	3
				miR-320b	3
				miR-24	3
				miR-25	3
				miR-30e	3
				miR-17	2
				miR-224	2
				miR-935	2
				miR-145	2
				miR-20a	2
				miR-103a	2
				miR-155	2
				miR-194	2
				miR-148a	2
				miR-574	2
				miR-99b	2
				miR-20b	2
				miR-629	2
				miR-5212	2
				miR-411	2
				miR-33a	2
				miR-376a	2
				miR-208a	2
				miR-27a	2
				miR-4485	2
				miR-101	2
				miR-130b	2
				miR-125b	2
				miR-423	2
				miR-301a	2
				let-7i	2
				miR-590	2
				let-7d	2
				miR-502	2
				miR-532	2
				miR-151	2
				miR-142a	1
				miR-223-5	1
				miR-361	1
				miR-485	1
				miR-15	1
				miR-210	1
				miR-200a	1
				miR-885	1
				miR-30b	1
				miR-130a	1
				miR-125a	1
				miR-324	1
				miR-190	1
				miR-214	1
				miR-649	1
				miR-449b	1
				miR-616	1
				miR-1978	1
				miR-10b	1
				miR-1229	1
				miR-1908	1
				miR-1243	1
				miR-208b	1
				miR-1286	1
				miR-410	1
				miR-637	1
				miR-5112	1
				miR-1298	1
				miR-30c1	1
				miR-3652	1
				miR-370	1
				miR-491	1
				miR-let7f2	1
				miR-1278	1
				miR-557	1
				miR-644	1
				miR-1291	1
				miR-331	1
				miR-891b	1
				miR-1266	1
				miR-1271	1
				miR-1301	1
				miR-216b	1
				miR-453	1
				miR-196b	1
				miR-597	1
				miR-523	1
				miR-1274b	1
				miR-483	1
				miR-499	1
				miR-30a	1
				miR-181a	1
				miR-433	1
				miR-568	1
				miR-642a	1
				miR-4792	1
				let-7	1
				miR-1260b	1
				miR-1273e	1
				miR-625	1
				miR-1290	1
				miR-4461	1
				miR-199b	1
				miR-378g	1
				miR-6126	1
				miR-127	1
				miR-3615	1
				miR-17	1
				miR-7	1
				miR-135b	1
				miR-144	1
				miR-149	1
				miR-206	1
				miR-1227	1
				miR-4691	1
				miR-219a	1
				miR-4728	1
				miR-103	1
				miR-3622a	1
				miR-4749	1
				miR-3926	1
				miR-4723	1
				miR-3690	1
				miR-4716	1
				miR-4525	1
				miR-2355	1
				miR-4782	1
				miR-451a	1
				miR-7641-2	1
				miR-30d	1
				miR-124a	1
				miR-2467	1
				miR-4649	1
				miR-4513	1
				miR-3132	1
				miR-7162	1
				miR-5682	1
				miR-19a	1
				miR-543	1
				miR-495	1
				miR-4761	1
				miR-623	1
				miR-4303	1
				miR-338	1
				miR-374b	1
				miR-378a	1
				miR-28	1
				miR-29c	1
				miR-32	1
				miR-99a	1
				miR-363	1
				miR-365a	1
				miR-424	1
				miR-660	1
				miR-29b	1
				miR-93-3p	1
				miR-339	1
				miR-497	1
				miR-505	1
				miR-766	1
				miR-638	1
				miR-320c	1
				miR-1281	1
				miR-4763	1
				miR-4787	1
				miR-1469	1
				miR-4487	1
				miR-2861	1
				miR-3960	1
				miR-1825	1
				miR-2277	1
				miR-4497	1
				miR-378	1
				miR-4508	1
				miR-4530	1
				let-7a	1
				miR-451	1
				miR-23b	1
				miR-107	1
				miR-425	1
				miR-106a	1
				let-7c	1
				miR-23a	1
				miR-520h	1
				miR-548d	1
				miR-644a	1

## Sheet: Formulas used
Value calculated	Formula used
SD from SEM	SEM*sqrt(N)
SD from 25th quartile	(25th quartile-average)/-0.67
SD from 75th quartile	(75th quartile-average)/0.67
Mean baseline (BL)	[@[Mean.BL]]/[@[Mean.BL]]
Standard Deviation (SD) BL	([@[SD.BL]]/[@[Mean.BL]])*[@[R.mean.BL]]
Mean follow-up (FU)	[@[Mean.FU]]/[@[Mean.BL]]
SD FU	([@[SD.FU]]/[@[Mean.FU]])
Fold change	[@[R.mean.BL]]/[@[R.mean.FU]]
